# Supplementary material for: Seasonal Vitamin D Status in Polish Elite Athletes in Relation to Sun Exposure and Oral Supplementation
Source: PubMed Central journal article supplement (PMC5061377; doi:10.1371/journal.pone.0164395), 2016-10-12
Supplement: pone.0164395.s001.pdf [file pone.0164395.s001.pdf]

| No. of person | Sex    | Month of measure | Year of measure | Age | BMI   | 25(OH)D Level | Supplementation | Preceding camp | Discipline type |
|---------------|--------|------------------|-----------------|-----|-------|---------------|-----------------|----------------|-----------------|
| 1             | male   | 10               | 2012            | 17  | 24,19 | 24,10         | 0               | 0              | Out             |
| 1             | male   | 1                | 2013            | 18  | 24,19 | 27,80         | 2               | 0              | Out             |
| 2             | male   | 6                | 2012            | 25  | 23,31 | 34,50         | 0               | 1              | Out             |
| 2             | male   | 7                | 2012            | 25  | 23,31 | 35,30         | 0               | 1              | Out             |
| 2             | male   | 1                | 2013            | 26  | 23,31 | 25,30         | 1               | 0              | Out             |
| 2             | male   | 7                | 2014            | 27  | 23,31 | 42,70         | 0               | 0              | Out             |
| 3             | female | 10               | 2014            | 24  | 19,51 | 25,10         | 0               | 0              | Out             |
| 4             | male   | 11               | 2010            | 26  | 23,10 | 18,90         | 0               | 0              | Out             |
| 4             | male   | 2                | 2011            | 27  | 23,10 | 32,80         | 2               | 0              | Out             |
| 4             | male   | 5                | 2011            | 27  | 23,04 | 30,40         | 2               | 0              | Out             |
| 4             | male   | 1                | 2013            | 29  | 23,04 | 26,50         | 1               | 0              | Out             |
| 4             | male   | 6                | 2013            | 29  | 23,04 | 28,00         | 0               | 0              | Out             |
| 5             | female | 11               | 2012            | 20  | 22,00 | 28,90         | 0               | 0              | Out             |
| 5             | female | 1                | 2013            | 21  | 22,00 | 37,60         | 2               | 0              | Out             |
| 5             | female | 2                | 2013            | 21  | 22,00 | 37,00         | 2               | 0              | Out             |
| 5             | female | 3                | 2013            | 21  | 22,00 | 40,00         | 2               | 0              | Out             |
| 5             | female | 12               | 2013            | 21  | 22,00 | 23,00         | 0               | 0              | Out             |
| 5             | female | 1                | 2014            | 22  | 22,00 | 43,00         | 2               | 0              | Out             |
| 5             | female | 6                | 2014            | 22  | 22,00 | 28,50         | 0               | 0              | Out             |
| 5             | female | 12               | 2014            | 22  | 22,00 | 34,30         | 2               | 0              | Out             |
| 6             | female | 6                | 2012            | 23  | 18,31 | 31,00         | 0               | 1              | Out             |
| 6             | female | 7                | 2012            | 23  | 18,31 | 32,00         | 0               | 1              | Out             |
| 6             | female | 2                | 2013            | 24  | 18,31 | 33,00         | 1               | 0              | Out             |
| 6             | female | 10               | 2014            | 25  | 18,31 | 20,00         | 0               | 0              | Out             |
| 7             | female | 12               | 2009            | 20  | 19,38 | 28,57         | 0               | 0              | Out             |
| 7             | female | 5                | 2010            | 22  | 19,38 | 54,10         | 1               | 1              | Out             |
| 7             | female | 7                | 2010            | 22  | 19,05 | 26,09         | 0               | 1              | Out             |
| 7             | female | 12               | 2010            | 22  | 19,18 | 22,46         | 0               | 0              | Out             |
| 7             | female | 12               | 2011            | 23  | 18,78 | 28,90         | 0               | 0              | Out             |
| 7             | female | 6                | 2012            | 24  | 18,78 | 37,70         | 0               | 1              | Out             |
| 7             | female | 11               | 2012            | 24  | 18,78 | 37,10         | 1               | 0              | Out             |
| 7             | female | 2                | 2013            | 25  | 18,78 | 55,00         | 1               | 0              | Out             |
| 7             | female | 6                | 2013            | 25  | 18,78 | 43,00         | 1               | 1              | Out             |
| 7             | female | 7                | 2013            | 25  | 18,78 | 50,00         | 0               | 1              | Out             |
| 7             | female | 12               | 2013            | 25  | 18,78 | 29,00         | 0               | 0              | Out             |
| 7             | female | 6                | 2014            | 26  | 18,78 | 36,80         | 0               | 0              | Out             |
| 7             | female | 7                | 2014            | 26  | 18,78 | 36,70         | 0               | 0              | Out             |
| 7             | female | 12               | 2014            | 26  | 18,78 | 31,90         | 2               | 0              | Out             |
| 7             | female | 1                | 2015            | 27  | 18,78 | 55,20         | 1               | 0              | Out             |
| 8             | male   | 5                | 2010            | 23  | 22,09 | 36,59         | 1               | 0              | Out             |

|    |        |    |      |    |       |       |   |   |     |
|----|--------|----|------|----|-------|-------|---|---|-----|
| 8  | male   | 7  | 2010 | 23 | 22,09 | 27,15 | 0 | 1 | Out |
| 8  | male   | 2  | 2011 | 24 | 21,97 | 21,10 | 0 | 0 | Out |
| 8  | male   | 11 | 2011 | 24 | 21,92 | 28,90 | 0 | 0 | Out |
| 9  | female | 4  | 2012 | 23 | 17,67 | 22,70 | 0 | 0 | Out |
| 10 | female | 2  | 2012 | 20 | 19,59 | 13,90 | 0 | 0 | Out |
| 10 | female | 9  | 2013 | 21 | 19,59 | 26,00 | 0 | 0 | Out |
| 10 | female | 10 | 2013 | 21 | 19,59 | 38,00 | 2 | 0 | Out |
| 10 | female | 1  | 2014 | 22 | 19,59 | 42,00 | 2 | 0 | Out |
| 10 | female | 6  | 2014 | 22 | 19,59 | 28,80 | 0 | 0 | Out |
| 10 | female | 10 | 2014 | 22 | 19,59 | 33,80 | 0 | 0 | Out |
| 11 | male   | 2  | 2011 | 20 | 25,00 | 34,10 | 0 | 0 | Out |
| 11 | male   | 5  | 2011 | 20 | 25,00 | 54,10 | 1 | 0 | Out |
| 12 | male   | 5  | 2011 | 27 | 22,77 | 28,70 | 1 | 0 | Out |
| 12 | male   | 1  | 2015 | 31 | 22,77 | 29,30 | 0 | 0 | Out |
| 13 | male   | 8  | 2011 | 18 | 23,95 | 27,30 | 0 | 0 | Out |
| 14 | male   | 5  | 2014 | 24 | 21,05 | 25,70 | 0 | 0 | Out |
| 15 | male   | 1  | 2013 | 21 | 24,04 | 24,40 | 0 | 0 | Out |
| 16 | female | 6  | 2011 | 21 | 18,87 | 69,90 | 1 | 1 | Out |
| 16 | female | 12 | 2011 | 21 | 18,83 | 40,80 | 0 | 0 | Out |
| 16 | female | 4  | 2013 | 23 | 18,83 | 40,00 | 1 | 1 | Out |
| 16 | female | 12 | 2013 | 23 | 18,83 | 29,00 | 0 | 0 | Out |
| 16 | female | 2  | 2015 | 25 | 18,83 | 26,50 | 0 | 0 | Out |
| 17 | female | 11 | 2009 | 23 | 19,03 | 25,76 | 0 | 0 | Out |
| 17 | female | 4  | 2010 | 24 | 19,72 | 59,38 | 1 | 0 | Out |
| 17 | female | 6  | 2010 | 24 | 19,38 | 30,08 | 0 | 1 | Out |
| 17 | female | 7  | 2010 | 24 | 19,38 | 25,66 | 0 | 1 | Out |
| 17 | female | 11 | 2010 | 24 | 19,72 | 20,40 | 0 | 0 | Out |
| 17 | female | 3  | 2011 | 25 | 19,72 | 23,70 | 0 | 0 | Out |
| 18 | male   | 11 | 2010 | 25 | 25,67 | 15,69 | 0 | 0 | Out |
| 18 | male   | 12 | 2010 | 25 | 25,67 | 21,10 | 0 | 0 | Out |
| 18 | male   | 2  | 2011 | 26 | 25,35 | 33,70 | 1 | 0 | Out |
| 18 | male   | 5  | 2011 | 26 | 24,51 | 30,20 | 0 | 1 | Out |
| 18 | male   | 11 | 2011 | 26 | 24,38 | 31,90 | 0 | 0 | Out |
| 18 | male   | 3  | 2013 | 28 | 24,38 | 39,00 | 2 | 0 | Out |
| 19 | male   | 4  | 2013 | 20 | 36,33 | 16,00 | 0 | 0 | Out |
| 20 | male   | 6  | 2012 | 24 | 23,97 | 38,30 | 1 | 1 | Out |
| 21 | female | 11 | 2012 | 26 | 17,23 | 20,80 | 0 | 0 | Out |
| 21 | female | 4  | 2013 | 27 | 17,23 | 32,00 | 1 | 0 | Out |
| 21 | female | 12 | 2013 | 27 | 17,23 | 19,00 | 0 | 0 | Out |
| 22 | male   | 11 | 2010 | 24 | 18,77 | 17,93 | 0 | 0 | Out |
| 22 | male   | 6  | 2012 | 26 | 18,77 | 26,70 | 0 | 0 | Out |

|    |        |    |      |    |       |       |   |   |     |
|----|--------|----|------|----|-------|-------|---|---|-----|
| 22 | male   | 5  | 2014 | 28 | 18,77 | 29,20 | 0 | 0 | Out |
| 23 | female | 10 | 2013 | 17 | 19,14 | 38,00 | 0 | 0 | Out |
| 24 | male   | 7  | 2014 | 25 | 27,95 | 31,30 | 0 | 0 | Out |
| 25 | female | 11 | 2009 | 32 | 19,32 | 54,81 | 2 | 0 | Out |
| 25 | female | 10 | 2010 | 33 | 18,71 | 18,17 | 0 | 0 | Out |
| 25 | female | 4  | 2011 | 34 | 36,10 | 39,70 | 1 | 1 | Out |
| 25 | female | 12 | 2011 | 34 | 18,98 | 21,80 | 0 | 0 | Out |
| 25 | female | 3  | 2012 | 35 | 18,98 | 29,40 | 1 | 0 | Out |
| 25 | female | 4  | 2012 | 35 | 18,98 | 29,40 | 1 | 1 | Out |
| 25 | female | 6  | 2012 | 35 | 18,98 | 41,30 | 1 | 1 | Out |
| 26 | female | 10 | 2010 | 24 | 21,70 | 19,47 | 0 | 0 | Out |
| 26 | female | 1  | 2011 | 25 | 21,63 | 34,80 | 1 | 0 | Out |
| 26 | female | 2  | 2011 | 25 | 21,63 | 38,60 | 1 | 1 | Out |
| 27 | female | 6  | 2010 | 22 | 19,60 | 32,50 | 0 | 1 | Out |
| 27 | female | 4  | 2011 | 23 | 19,07 | 38,10 | 1 | 1 | Out |
| 27 | female | 6  | 2011 | 23 | 19,07 | 37,80 | 0 | 1 | Out |
| 27 | female | 11 | 2011 | 23 | 20,07 | 41,30 | 0 | 0 | Out |
| 27 | female | 6  | 2012 | 24 | 20,07 | 51,20 | 0 | 1 | Out |
| 27 | female | 11 | 2012 | 24 | 20,07 | 38,30 | 0 | 0 | Out |
| 27 | female | 4  | 2013 | 25 | 20,07 | 36,00 | 1 | 1 | Out |
| 27 | female | 10 | 2013 | 25 | 20,07 | 36,00 | 0 | 0 | Out |
| 27 | female | 12 | 2013 | 25 | 20,07 | 53,00 | 1 | 0 | Out |
| 27 | female | 11 | 2014 | 26 | 20,07 | 30,80 | 0 | 0 | Out |
| 27 | female | 12 | 2014 | 26 | 20,07 | 39,50 | 2 | 0 | Out |
| 28 | male   | 12 | 2009 | 21 | 23,10 | 25,00 | 0 | 0 | Out |
| 28 | male   | 4  | 2010 | 22 | 23,10 | 22,52 | 0 | 0 | Out |
| 28 | male   | 10 | 2010 | 22 | 23,10 | 17,00 | 0 | 0 | Out |
| 28 | male   | 2  | 2011 | 23 | 24,00 | 32,80 | 1 | 0 | Out |
| 28 | male   | 3  | 2011 | 23 | 23,88 | 28,30 | 0 | 1 | Out |
| 28 | male   | 7  | 2011 | 22 | 23,04 | 31,50 | 0 | 0 | Out |
| 28 | male   | 10 | 2011 | 22 | 23,04 | 23,90 | 0 | 0 | Out |
| 28 | male   | 11 | 2011 | 22 | 23,04 | 28,00 | 0 | 0 | Out |
| 28 | male   | 12 | 2011 | 22 | 23,04 | 23,80 | 0 | 0 | Out |
| 28 | male   | 6  | 2012 | 23 | 23,04 | 19,80 | 0 | 0 | Out |
| 28 | male   | 1  | 2013 | 24 | 23,04 | 33,70 | 2 | 0 | Out |
| 28 | male   | 2  | 2013 | 24 | 23,04 | 46,00 | 2 | 0 | Out |
| 29 | male   | 7  | 2012 | 24 | 34,30 | 40,00 | 0 | 1 | Out |
| 29 | male   | 1  | 2013 | 25 | 34,30 | 27,30 | 0 | 0 | Out |
| 29 | male   | 2  | 2014 | 26 | 34,30 | 43,00 | 1 | 0 | Out |
| 30 | male   | 2  | 2011 | 22 | 21,60 | 66,70 | 1 | 0 | Out |
| 30 | male   | 4  | 2011 | 22 | 21,60 | 45,80 | 1 | 1 | Out |

|    |        |    |      |    |       |       |   |   |     |
|----|--------|----|------|----|-------|-------|---|---|-----|
| 31 | male   | 12 | 2010 | 27 | 25,36 | 19,40 | 0 | 0 | Out |
| 31 | male   | 6  | 2012 | 29 | 25,36 | 35,20 | 0 | 1 | Out |
| 31 | male   | 2  | 2013 | 30 | 25,36 | 40,00 | 1 | 0 | Out |
| 31 | male   | 11 | 2014 | 31 | 25,36 | 29,70 | 0 | 0 | Out |
| 32 | male   | 2  | 2013 | 21 | 21,11 | 14,00 | 0 | 0 | Out |
| 32 | male   | 4  | 2013 | 21 | 21,11 | 32,00 | 2 | 0 | Out |
| 33 | male   | 10 | 2010 | 27 | 21,86 | 20,84 | 0 | 0 | Out |
| 33 | male   | 3  | 2011 | 28 | 22,25 | 20,40 | 0 | 0 | Out |
| 34 | male   | 11 | 2010 | 24 | 22,14 | 17,78 | 0 | 0 | Out |
| 34 | male   | 2  | 2011 | 25 | 21,47 | 40,30 | 1 | 0 | Out |
| 34 | male   | 3  | 2011 | 25 | 21,47 | 29,80 | 0 | 1 | Out |
| 34 | male   | 2  | 2015 | 29 | 21,47 | 27,90 | 0 | 0 | Out |
| 35 | male   | 2  | 2011 | 24 | 22,88 | 32,40 | 1 | 0 | Out |
| 35 | male   | 8  | 2011 | 24 | 22,16 | 32,40 | 0 | 0 | Out |
| 35 | male   | 10 | 2011 | 24 | 22,16 | 35,90 | 0 | 0 | Out |
| 35 | male   | 2  | 2012 | 25 | 22,16 | 26,20 | 0 | 0 | Out |
| 36 | male   | 10 | 2013 | 19 | 21,22 | 27,00 | 0 | 0 | Out |
| 36 | male   | 6  | 2014 | 20 | 21,22 | 36,50 | 0 | 0 | Out |
| 36 | male   | 2  | 2015 | 21 | 21,22 | 38,60 | 1 | 0 | Out |
| 37 | female | 2  | 2010 | 28 | 19,49 | 24,93 | 0 | 0 | Out |
| 37 | female | 11 | 2010 | 29 | 19,49 | 20,06 | 0 | 0 | Out |
| 37 | female | 4  | 2011 | 30 | 20,48 | 31,20 | 0 | 1 | Out |
| 37 | female | 11 | 2011 | 30 | 20,15 | 37,50 | 0 | 0 | Out |
| 37 | female | 5  | 2012 | 31 | 20,15 | 49,60 | 0 | 1 | Out |
| 37 | female | 2  | 2013 | 32 | 20,15 | 29,00 | 0 | 1 | Out |
| 37 | female | 12 | 2013 | 32 | 20,15 | 30,00 | 0 | 0 | Out |
| 37 | female | 2  | 2014 | 33 | 20,15 | 26,00 | 0 | 0 | Out |
| 37 | female | 6  | 2014 | 33 | 20,15 | 31,10 | 0 | 0 | Out |
| 38 | male   | 3  | 2012 | 25 | 24,46 | 21,20 | 0 | 0 | Out |
| 39 | male   | 4  | 2010 | 34 | 19,46 | 30,37 | 0 | 0 | Out |
| 40 | male   | 7  | 2010 | 27 | 23,27 | 30,80 | 0 | 0 | Out |
| 40 | male   | 1  | 2011 | 28 | 23,24 | 29,40 | 0 | 0 | Out |
| 40 | male   | 3  | 2011 | 28 | 23,24 | 38,50 | 1 | 0 | Out |
| 41 | female | 3  | 2012 | 27 | 19,74 | 41,50 | 1 | 1 | Out |
| 41 | female | 4  | 2012 | 27 | 19,74 | 30,50 | 1 | 1 | Out |
| 41 | female | 6  | 2012 | 27 | 19,74 | 32,20 | 2 | 0 | Out |
| 41 | female | 11 | 2012 | 27 | 19,74 | 20,70 | 0 | 0 | Out |
| 41 | female | 1  | 2013 | 28 | 19,74 | 35,80 | 2 | 0 | Out |
| 41 | female | 3  | 2013 | 28 | 19,74 | 29,00 | 2 | 0 | Out |
| 41 | female | 4  | 2013 | 28 | 19,74 | 33,00 | 2 | 0 | Out |
| 41 | female | 7  | 2013 | 28 | 19,74 | 46,00 | 2 | 0 | Out |

|    |        |    |      |    |       |       |   |   |     |
|----|--------|----|------|----|-------|-------|---|---|-----|
| 41 | female | 11 | 2013 | 28 | 19,74 | 24,00 | 0 | 0 | Out |
| 41 | female | 4  | 2014 | 29 | 19,74 | 47,00 | 1 | 0 | Out |
| 41 | female | 6  | 2014 | 29 | 19,74 | 41,00 | 2 | 0 | Out |
| 41 | female | 12 | 2014 | 29 | 19,74 | 34,10 | 2 | 0 | Out |
| 42 | female | 11 | 2010 | 16 | 17,47 | 42,22 | 0 | 0 | Out |
| 43 | female | 12 | 2009 | 23 | 19,38 | 33,60 | 1 | 0 | Out |
| 43 | female | 2  | 2011 | 25 | 19,38 | 42,10 | 1 | 0 | Out |
| 43 | female | 3  | 2011 | 25 | 19,38 | 30,60 | 0 | 1 | Out |
| 43 | female | 4  | 2012 | 26 | 19,38 | 56,50 | 1 | 1 | Out |
| 43 | female | 10 | 2012 | 26 | 19,38 | 40,30 | 0 | 0 | Out |
| 43 | female | 4  | 2013 | 27 | 19,38 | 24,00 | 0 | 0 | Out |
| 44 | female | 2  | 2015 | 20 | 17,10 | 39,10 | 0 | 0 | Out |
| 45 | male   | 1  | 2010 | 21 | 32,90 | 27,77 | 0 | 0 | Out |
| 45 | male   | 11 | 2010 | 21 | 34,25 | 18,23 | 0 | 0 | Out |
| 45 | male   | 6  | 2011 | 22 | 34,22 | 32,60 | 0 | 1 | Out |
| 45 | male   | 1  | 2012 | 23 | 34,22 | 29,80 | 0 | 0 | Out |
| 45 | male   | 2  | 2012 | 23 | 34,22 | 64,70 | 1 | 1 | Out |
| 45 | male   | 11 | 2012 | 23 | 34,22 | 30,10 | 0 | 0 | Out |
| 45 | male   | 9  | 2013 | 24 | 34,22 | 27,00 | 0 | 0 | Out |
| 45 | male   | 10 | 2013 | 24 | 34,22 | 34,00 | 2 | 0 | Out |
| 45 | male   | 11 | 2014 | 25 | 34,22 | 27,80 | 0 | 0 | Out |
| 46 | male   | 1  | 2010 | 30 | 20,90 | 21,74 | 0 | 0 | Out |
| 46 | male   | 4  | 2011 | 31 | 20,20 | 39,30 | 1 | 1 | Out |
| 46 | male   | 11 | 2011 | 31 | 21,36 | 30,00 | 0 | 0 | Out |
| 46 | male   | 12 | 2012 | 32 | 21,36 | 25,70 | 0 | 0 | Out |
| 46 | male   | 1  | 2013 | 33 | 21,36 | 20,80 | 0 | 0 | Out |
| 46 | male   | 11 | 2014 | 34 | 21,36 | 29,30 | 0 | 0 | Out |
| 47 | female | 6  | 2012 | 23 | 34,64 | 35,00 | 0 | 1 | Out |
| 47 | female | 10 | 2012 | 23 | 34,64 | 31,10 | 0 | 0 | Out |
| 47 | female | 1  | 2013 | 24 | 34,64 | 34,40 | 2 | 0 | Out |
| 47 | female | 9  | 2013 | 24 | 34,64 | 19,00 | 0 | 0 | Out |
| 47 | female | 4  | 2014 | 25 | 34,64 | 29,00 | 1 | 0 | Out |
| 47 | female | 10 | 2014 | 25 | 34,64 | 21,70 | 0 | 0 | Out |
| 48 | male   | 2  | 2013 | 22 | 20,39 | 14,00 | 0 | 0 | Out |
| 49 | female | 12 | 2009 | 32 | 19,39 | 26,67 | 0 | 0 | Out |
| 49 | female | 7  | 2010 | 33 | 19,47 | 27,44 | 0 | 0 | Out |
| 49 | female | 6  | 2011 | 34 | 19,00 | 63,60 | 0 | 1 | Out |
| 49 | female | 7  | 2011 | 34 | 19,00 | 49,10 | 0 | 1 | Out |
| 50 | male   | 11 | 2010 | 25 | 41,04 | 19,05 | 0 | 0 | Out |
| 50 | male   | 5  | 2011 | 26 | 40,61 | 24,50 | 0 | 0 | Out |
| 50 | male   | 6  | 2012 | 27 | 40,61 | 36,00 | 0 | 1 | Out |

|    |        |    |      |    |       |       |   |   |     |
|----|--------|----|------|----|-------|-------|---|---|-----|
| 50 | male   | 12 | 2012 | 27 | 40,61 | 31,00 | 2 | 0 | Out |
| 51 | male   | 12 | 2009 | 28 | 19,68 | 26,51 | 0 | 0 | Out |
| 51 | male   | 2  | 2011 | 30 | 17,26 | 16,90 | 0 | 0 | Out |
| 51 | male   | 8  | 2011 | 31 | 20,43 | 35,40 | 0 | 0 | Out |
| 51 | male   | 12 | 2012 | 32 | 20,43 | 20,70 | 0 | 0 | Out |
| 52 | female | 12 | 2009 | 26 | 28,20 | 26,51 | 0 | 0 | Out |
| 52 | female | 6  | 2010 | 27 | 27,31 | 24,33 | 0 | 0 | Out |
| 52 | female | 11 | 2010 | 27 | 27,32 | 26,83 | 0 | 0 | Out |
| 52 | female | 6  | 2011 | 28 | 26,36 | 39,70 | 0 | 1 | Out |
| 52 | female | 11 | 2011 | 28 | 27,76 | 50,30 | 2 | 0 | Out |
| 52 | female | 6  | 2012 | 29 | 27,76 | 44,40 | 0 | 1 | Out |
| 52 | female | 2  | 2013 | 30 | 27,76 | 56,00 | 1 | 0 | Out |
| 52 | female | 12 | 2013 | 30 | 27,76 | 27,00 | 0 | 0 | Out |
| 52 | female | 12 | 2014 | 31 | 27,76 | 34,30 | 2 | 0 | Out |
| 53 | female | 10 | 2010 | 18 | 19,49 | 18,49 | 0 | 0 | Out |
| 53 | female | 6  | 2012 | 20 | 19,49 | 26,00 | 0 | 1 | Out |
| 53 | female | 7  | 2012 | 20 | 19,49 | 28,60 | 0 | 0 | Out |
| 53 | female | 2  | 2013 | 21 | 19,49 | 13,00 | 0 | 0 | Out |
| 53 | female | 4  | 2013 | 21 | 19,49 | 39,00 | 1 | 0 | Out |
| 53 | female | 12 | 2013 | 21 | 19,49 | 15,00 | 0 | 0 | Out |
| 53 | female | 8  | 2014 | 22 | 19,49 | 32,50 | 0 | 0 | Out |
| 54 | male   | 5  | 2014 | 24 | 25,83 | 54,10 | 2 | 0 | Out |
| 54 | male   | 12 | 2014 | 24 | 25,83 | 36,60 | 0 | 0 | Out |
| 55 | male   | 2  | 2011 | 21 | 25,83 | 12,23 | 0 | 0 | Out |
| 55 | male   | 4  | 2012 | 22 | 25,83 | 23,90 | 0 | 0 | Out |
| 55 | male   | 12 | 2012 | 22 | 25,83 | 29,70 | 2 | 0 | Out |
| 55 | male   | 1  | 2013 | 23 | 25,83 | 30,30 | 2 | 0 | Out |
| 55 | male   | 5  | 2013 | 23 | 25,83 | 46,00 | 2 | 0 | Out |
| 56 | female | 11 | 2010 | 19 | 33,12 | 16,23 | 0 | 0 | Out |
| 56 | female | 5  | 2011 | 20 | 32,45 | 20,70 | 0 | 0 | Out |
| 56 | female | 11 | 2011 | 20 | 33,09 | 25,70 | 0 | 0 | Out |
| 56 | female | 5  | 2012 | 21 | 33,09 | 21,60 | 0 | 0 | Out |
| 56 | female | 12 | 2012 | 21 | 33,09 | 17,90 | 0 | 0 | Out |
| 56 | female | 6  | 2013 | 22 | 33,09 | 23,00 | 0 | 0 | Out |
| 56 | female | 6  | 2014 | 23 | 33,09 | 18,10 | 0 | 0 | Out |
| 57 | female | 2  | 2012 | 32 | 20,55 | 7,90  | 0 | 0 | Out |
| 58 | male   | 12 | 2012 | 21 | 22,13 | 19,10 | 0 | 0 | Out |
| 58 | male   | 4  | 2013 | 22 | 22,13 | 38,00 | 2 | 0 | Out |
| 59 | male   | 6  | 2011 | 21 | 22,86 | 43,70 | 0 | 0 | Out |
| 60 | male   | 2  | 2015 | 23 | 34,23 | 11,80 | 0 | 0 | Out |
| 61 | female | 2  | 2013 | 17 | 23,60 | 21,00 | 0 | 0 | Out |

|    |        |    |      |    |       |       |   |   |     |
|----|--------|----|------|----|-------|-------|---|---|-----|
| 61 | female | 3  | 2014 | 18 | 23,60 | 18,00 | 0 | 0 | Out |
| 62 | male   | 2  | 2012 | 23 | 22,18 | 36,50 | 1 | 0 | Out |
| 62 | male   | 12 | 2012 | 23 | 22,18 | 31,00 | 0 | 0 | Out |
| 62 | male   | 12 | 2014 | 25 | 22,18 | 23,00 | 0 | 0 | Out |
| 63 | female | 1  | 2013 | 21 | 19,49 | 36,00 | 1 | 0 | Out |
| 63 | female | 7  | 2013 | 21 | 19,49 | 29,00 | 0 | 1 | Out |
| 63 | female | 12 | 2013 | 21 | 19,49 | 23,00 | 0 | 0 | Out |
| 63 | female | 5  | 2014 | 22 | 19,49 | 42,30 | 2 | 0 | Out |
| 63 | female | 8  | 2014 | 22 | 19,49 | 38,90 | 0 | 0 | Out |
| 63 | female | 12 | 2014 | 22 | 19,49 | 20,00 | 0 | 0 | Out |
| 63 | female | 1  | 2015 | 23 | 19,49 | 34,90 | 1 | 0 | Out |
| 64 | female | 11 | 2010 | 20 | 19,63 | 22,60 | 0 | 0 | Out |
| 64 | female | 6  | 2012 | 22 | 19,63 | 51,60 | 0 | 1 | Out |
| 65 | male   | 11 | 2010 | 27 | 26,65 | 30,27 | 0 | 0 | Out |
| 65 | male   | 7  | 2011 | 28 | 25,63 | 62,70 | 0 | 1 | Out |
| 65 | male   | 1  | 2012 | 29 | 25,63 | 45,70 | 1 | 0 | Out |
| 65 | male   | 11 | 2012 | 29 | 25,63 | 54,40 | 0 | 0 | Out |
| 65 | male   | 1  | 2013 | 30 | 25,63 | 40,50 | 1 | 0 | Out |
| 66 | male   | 4  | 2010 | 20 | 21,74 | 31,03 | 0 | 0 | Out |
| 66 | male   | 10 | 2010 | 20 | 20,53 | 18,21 | 0 | 0 | Out |
| 66 | male   | 1  | 2011 | 21 | 20,53 | 37,50 | 2 | 0 | Out |
| 66 | male   | 3  | 2011 | 21 | 21,13 | 33,30 | 0 | 0 | Out |
| 66 | male   | 4  | 2011 | 21 | 21,13 | 48,70 | 2 | 0 | Out |
| 66 | male   | 6  | 2011 | 21 | 21,13 | 42,50 | 2 | 0 | Out |
| 66 | male   | 10 | 2014 | 24 | 21,13 | 35,90 | 0 | 0 | Out |
| 66 | male   | 1  | 2015 | 25 | 21,13 | 47,18 | 1 | 0 | Out |
| 67 | female | 12 | 2009 | 28 | 22,72 | 31,48 | 0 | 0 | Out |
| 67 | female | 9  | 2010 | 29 | 22,24 | 27,16 | 0 | 0 | Out |
| 67 | female | 11 | 2011 | 29 | 24,42 | 33,80 | 0 | 0 | Out |
| 68 | female | 6  | 2011 | 20 | 19,82 | 41,30 | 0 | 0 | Out |
| 69 | female | 12 | 2014 | 19 | 19,37 | 20,30 | 0 | 0 | Out |
| 70 | male   | 6  | 2012 | 20 | 22,03 | 68,40 | 0 | 1 | Out |
| 70 | female | 6  | 2013 | 21 | 22,03 | 53,00 | 0 | 1 | Out |
| 71 | male   | 7  | 2010 | 25 | 20,16 | 24,52 | 0 | 0 | Out |
| 71 | male   | 10 | 2010 | 25 | 20,16 | 24,05 | 0 | 0 | Out |
| 71 | male   | 4  | 2011 | 26 | 19,72 | 67,90 | 1 | 0 | Out |
| 71 | male   | 1  | 2013 | 28 | 19,72 | 33,10 | 1 | 0 | Out |
| 71 | male   | 7  | 2013 | 28 | 19,72 | 31,00 | 0 | 0 | Out |
| 71 | male   | 12 | 2013 | 28 | 19,72 | 28,00 | 0 | 0 | Out |
| 72 | female | 1  | 2010 | 24 | 20,94 | 36,21 | 0 | 0 | Out |
| 72 | female | 5  | 2010 | 10 | 20,94 | 54,40 | 1 | 1 | Out |

|    |        |    |      |    |       |       |   |   |     |
|----|--------|----|------|----|-------|-------|---|---|-----|
| 72 | female | 6  | 2010 | 24 | 20,94 | 35,45 | 0 | 1 | Out |
| 72 | female | 7  | 2010 | 24 | 20,94 | 24,26 | 0 | 1 | Out |
| 72 | female | 1  | 2011 | 25 | 21,12 | 20,43 | 0 | 0 | Out |
| 72 | female | 5  | 2011 | 26 | 21,30 | 54,70 | 1 | 1 | Out |
| 72 | female | 6  | 2011 | 26 | 21,30 | 45,30 | 0 | 1 | Out |
| 72 | female | 7  | 2011 | 25 | 21,30 | 31,10 | 0 | 1 | Out |
| 72 | female | 11 | 2011 | 24 | 21,12 | 19,15 | 0 | 0 | Out |
| 72 | female | 12 | 2011 | 25 | 21,49 | 37,00 | 0 | 0 | Out |
| 72 | female | 4  | 2012 | 26 | 20,94 | 58,10 | 1 | 1 | Out |
| 72 | female | 7  | 2012 | 26 | 21,49 | 45,10 | 0 | 1 | Out |
| 72 | female | 1  | 2013 | 27 | 21,49 | 30,80 | 1 | 0 | Out |
| 72 | female | 4  | 2013 | 27 | 21,49 | 43,00 | 1 | 1 | Out |
| 72 | female | 11 | 2014 | 28 | 20,94 | 29,30 | 0 | 0 | Out |
| 73 | female | 5  | 2009 | 31 | 19,66 | 35,83 | 1 | 1 | Out |
| 73 | female | 12 | 2009 | 31 | 20,55 | 24,04 | 0 | 0 | Out |
| 73 | female | 6  | 2010 | 32 | 19,84 | 35,83 | 0 | 1 | Out |
| 73 | female | 7  | 2010 | 32 | 19,84 | 28,26 | 0 | 1 | Out |
| 73 | female | 9  | 2010 | 32 | 20,02 | 22,67 | 0 | 0 | Out |
| 73 | female | 10 | 2010 | 32 | 20,02 | 18,91 | 0 | 0 | Out |
| 73 | female | 12 | 2010 | 32 | 20,02 | 16,61 | 0 | 0 | Out |
| 73 | female | 3  | 2011 | 33 | 20,02 | 82,00 | 1 | 1 | Out |
| 73 | female | 4  | 2011 | 33 | 20,02 | 72,80 | 1 | 1 | Out |
| 73 | female | 8  | 2011 | 33 | 20,02 | 40,20 | 0 | 0 | Out |
| 73 | female | 10 | 2011 | 33 | 20,02 | 34,20 | 0 | 0 | Out |
| 73 | female | 1  | 2012 | 34 | 20,02 | 31,50 | 1 | 0 | Out |
| 73 | female | 3  | 2012 | 34 | 20,02 | 52,40 | 1 | 1 | Out |
| 73 | female | 6  | 2012 | 34 | 20,02 | 42,30 | 0 | 1 | Out |
| 73 | female | 7  | 2012 | 34 | 20,02 | 37,40 | 0 | 1 | Out |
| 73 | female | 12 | 2012 | 34 | 20,02 | 24,40 | 0 | 0 | Out |
| 73 | female | 5  | 2013 | 35 | 20,02 | 20,00 | 0 | 0 | Out |
| 74 | female | 1  | 2010 | 28 | 20,67 | 34,68 | 0 | 0 | Out |
| 74 | female | 5  | 2010 | 28 | 20,67 | 63,95 | 1 | 1 | Out |
| 75 | male   | 12 | 2012 | 19 | 19,76 | 20,40 | 0 | 0 | Out |
| 76 | female | 1  | 2012 | 21 | 15,98 | 44,90 | 2 | 0 | Out |
| 76 | female | 11 | 2012 | 21 | 15,98 | 39,50 | 2 | 0 | Out |
| 76 | female | 5  | 2013 | 22 | 15,98 | 33,00 | 2 | 0 | Out |
| 76 | female | 10 | 2013 | 22 | 15,98 | 33,00 | 0 | 0 | Out |
| 76 | female | 11 | 2013 | 22 | 15,98 | 32,00 | 0 | 0 | Out |
| 76 | female | 6  | 2014 | 23 | 15,98 | 26,00 | 0 | 0 | Out |
| 76 | female | 10 | 2014 | 23 | 15,98 | 43,60 | 0 | 0 | Out |
| 76 | female | 11 | 2014 | 23 | 15,98 | 31,40 | 0 | 0 | Out |



|    |        |    |      |    |       |       |   |   |     |
|----|--------|----|------|----|-------|-------|---|---|-----|
| 76 | female | 12 | 2014 | 23 | 15,98 | 29,40 | 2 | 0 | Out |
| 76 | female | 2  | 2015 | 24 | 15,98 | 42,00 | 1 | 0 | Out |
| 77 | female | 9  | 2014 | 25 | 23,62 | 28,90 | 0 | 0 | Out |
| 78 | female | 1  | 2013 | 20 | 20,67 | 54,50 | 0 | 0 | Out |
| 79 | male   | 12 | 2014 | 21 | 29,33 | 13,90 | 0 | 0 | Out |
| 80 | female | 6  | 2011 | 21 | 19,43 | 31,00 | 0 | 0 | Out |
| 81 | female | 9  | 2013 | 26 | 18,33 | 32,00 | 0 | 0 | Out |
| 81 | female | 3  | 2014 | 27 | 18,33 | 31,00 | 2 | 0 | Out |
| 81 | female | 10 | 2014 | 27 | 18,33 | 23,00 | 0 | 0 | Out |
| 82 | female | 11 | 2010 | 18 | 23,87 | 10,46 | 0 | 0 | Out |
| 83 | male   | 11 | 2009 | 25 | 22,44 | 28,66 | 0 | 0 | Out |
| 83 | male   | 4  | 2010 | 26 | 23,08 | 32,78 | 1 | 0 | Out |
| 84 | male   | 6  | 2011 | 22 | 20,30 | 25,50 | 0 | 0 | Out |
| 84 | male   | 4  | 2012 | 23 | 20,30 | 22,30 | 0 | 0 | Out |
| 84 | male   | 1  | 2013 | 24 | 20,30 | 20,90 | 0 | 0 | Out |
| 84 | male   | 2  | 2013 | 24 | 20,30 | 25,00 | 0 | 0 | Out |
| 84 | male   | 7  | 2013 | 24 | 20,30 | 23,00 | 0 | 0 | Out |
| 84 | male   | 7  | 2014 | 25 | 20,30 | 27,10 | 0 | 0 | Out |
| 84 | male   | 2  | 2015 | 26 | 20,30 | 14,40 | 0 | 0 | Out |
| 85 | female | 1  | 2010 | 20 | 18,51 | 27,15 | 0 | 0 | Out |
| 85 | female | 2  | 2010 | 20 | 18,51 | 17,57 | 0 | 0 | Out |
| 85 | female | 4  | 2010 | 20 | 18,51 | 32,28 | 1 | 1 | Out |
| 85 | female | 6  | 2010 | 20 | 18,69 | 25,63 | 0 | 1 | Out |
| 85 | female | 7  | 2010 | 20 | 18,69 | 25,74 | 0 | 0 | Out |
| 85 | female | 8  | 2010 | 20 | 18,69 | 27,30 | 0 | 0 | Out |
| 85 | female | 10 | 2010 | 20 | 18,44 | 22,16 | 0 | 0 | Out |
| 85 | female | 1  | 2011 | 21 | 19,38 | 22,87 | 0 | 0 | Out |
| 85 | female | 2  | 2011 | 21 | 19,38 | 62,40 | 1 | 0 | Out |
| 85 | female | 3  | 2011 | 21 | 19,38 | 36,32 | 0 | 1 | Out |
| 85 | female | 4  | 2011 | 21 | 19,38 | 54,10 | 1 | 1 | Out |
| 85 | female | 5  | 2011 | 21 | 19,38 | 28,40 | 0 | 1 | Out |
| 85 | female | 6  | 2011 | 21 | 19,38 | 40,90 | 0 | 0 | Out |
| 85 | female | 7  | 2011 | 21 | 19,38 | 34,40 | 0 | 0 | Out |
| 85 | female | 9  | 2011 | 21 | 19,38 | 37,00 | 0 | 0 | Out |
| 85 | female | 11 | 2011 | 21 | 19,38 | 38,10 | 2 | 0 | Out |
| 85 | female | 1  | 2012 | 22 | 19,38 | 32,90 | 2 | 0 | Out |
| 85 | female | 1  | 2012 | 22 | 19,38 | 39,20 | 2 | 0 | Out |
| 85 | female | 4  | 2012 | 22 | 19,38 | 53,80 | 2 | 1 | Out |
| 85 | female | 5  | 2012 | 22 | 19,38 | 50,70 | 0 | 1 | Out |
| 85 | female | 6  | 2012 | 22 | 19,38 | 40,90 | 0 | 1 | Out |
| 85 | female | 7  | 2012 | 22 | 19,38 | 39,50 | 0 | 0 | Out |

|    |        |    |      |    |       |       |   |   |     |
|----|--------|----|------|----|-------|-------|---|---|-----|
| 85 | female | 10 | 2012 | 22 | 19,38 | 24,10 | 0 | 0 | Out |
| 85 | female | 1  | 2013 | 23 | 19,38 | 26,60 | 0 | 0 | Out |
| 85 | female | 4  | 2013 | 23 | 19,38 | 30,00 | 2 | 0 | Out |
| 85 | female | 11 | 2013 | 23 | 19,38 | 36,00 | 2 | 0 | Out |
| 85 | female | 4  | 2014 | 24 | 19,38 | 38,90 | 2 | 0 | Out |
| 85 | female | 6  | 2014 | 24 | 19,38 | 40,00 | 0 | 0 | Out |
| 85 | female | 10 | 2014 | 24 | 19,38 | 30,00 | 0 | 0 | Out |
| 86 | male   | 11 | 2009 | 29 | 25,68 | 25,09 | 0 | 0 | Out |
| 86 | male   | 4  | 2010 | 30 | 26,22 | 32,69 | 1 | 0 | Out |
| 86 | male   | 11 | 2010 | 30 | 26,13 | 33,82 | 0 | 0 | Out |
| 86 | male   | 2  | 2011 | 31 | 25,68 | 31,40 | 0 | 0 | Out |
| 86 | male   | 3  | 2011 | 31 | 25,68 | 22,80 | 0 | 0 | Out |
| 87 | male   | 11 | 2010 | 26 | 20,78 | 15,90 | 0 | 0 | Out |
| 87 | male   | 2  | 2011 | 27 | 20,78 | 15,90 | 0 | 0 | Out |
| 88 | female | 10 | 2010 | 18 | 20,24 | 14,11 | 0 | 0 | Out |
| 88 | female | 7  | 2011 | 19 | 19,95 | 28,90 | 0 | 0 | Out |
| 88 | female | 10 | 2011 | 19 | 19,95 | 22,90 | 0 | 0 | Out |
| 89 | female | 6  | 2011 | 18 | 17,46 | 38,80 | 0 | 1 | Out |
| 89 | female | 3  | 2012 | 19 | 17,46 | 28,20 | 0 | 0 | Out |
| 89 | female | 4  | 2013 | 20 | 17,46 | 24,00 | 0 | 0 | Out |
| 89 | female | 11 | 2013 | 20 | 17,46 | 31,00 | 0 | 0 | Out |
| 89 | female | 5  | 2014 | 21 | 17,46 | 33,90 | 0 | 0 | Out |
| 89 | female | 12 | 2014 | 21 | 17,46 | 29,30 | 0 | 0 | Out |
| 89 | female | 1  | 2015 | 22 | 17,46 | 34,90 | 2 | 0 | Out |
| 90 | female | 6  | 2012 | 17 | 19,34 | 22,10 | 0 | 0 | Out |
| 91 | male   | 12 | 2011 | 21 | 28,82 | 25,10 | 0 | 0 | Out |
| 92 | female | 1  | 2010 | 29 | 21,18 | 30,44 | 0 | 0 | Out |
| 92 | female | 7  | 2010 | 29 | 22,99 | 36,47 | 0 | 0 | Out |
| 92 | female | 1  | 2011 | 30 | 22,99 | 22,90 | 0 | 0 | Out |
| 92 | female | 5  | 2011 | 30 | 21,44 | 23,90 | 0 | 0 | Out |
| 92 | female | 11 | 2011 | 30 | 21,18 | 36,20 | 2 | 0 | Out |
| 92 | female | 7  | 2012 | 30 | 21,18 | 35,40 | 0 | 0 | Out |
| 93 | female | 2  | 2013 | 27 | 18,98 | 21,00 | 0 | 0 | Out |
| 94 | female | 12 | 2009 | 20 | 20,52 | 36,57 | 0 | 0 | Out |
| 94 | female | 5  | 2010 | 21 | 20,39 | 43,63 | 1 | 0 | Out |
| 94 | female | 7  | 2010 | 21 | 20,39 | 36,47 | 0 | 0 | Out |
| 94 | female | 12 | 2010 | 21 | 20,39 | 18,79 | 0 | 0 | Out |
| 94 | female | 1  | 2011 | 22 | 20,39 | 31,80 | 1 | 0 | Out |
| 94 | female | 6  | 2011 | 22 | 20,39 | 67,60 | 0 | 1 | Out |
| 94 | female | 1  | 2013 | 24 | 20,39 | 53,30 | 1 | 0 | Out |
| 95 | female | 12 | 2009 | 24 | 17,17 | 30,11 | 0 | 0 | Out |

|    |        |    |      |    |       |       |   |   |     |
|----|--------|----|------|----|-------|-------|---|---|-----|
| 95 | female | 4  | 2010 | 25 | 17,98 | 36,57 | 1 | 1 | Out |
| 95 | female | 10 | 2010 | 25 | 16,92 | 24,18 | 0 | 0 | Out |
| 95 | female | 1  | 2011 | 26 | 16,92 | 35,80 | 1 | 0 | Out |
| 95 | female | 3  | 2011 | 26 | 16,92 | 47,10 | 1 | 1 | Out |
| 95 | female | 6  | 2011 | 26 | 17,40 | 41,10 | 0 | 1 | Out |
| 95 | female | 3  | 2012 | 27 | 17,40 | 57,10 | 1 | 1 | Out |
| 95 | female | 6  | 2012 | 27 | 17,40 | 53,60 | 0 | 1 | Out |
| 95 | female | 1  | 2013 | 28 | 17,40 | 28,10 | 1 | 0 | Out |
| 95 | female | 5  | 2013 | 28 | 17,40 | 21,00 | 0 | 0 | Out |
| 95 | female | 6  | 2014 | 29 | 17,40 | 23,60 | 0 | 0 | Out |
| 95 | female | 12 | 2014 | 29 | 17,40 | 24,40 | 0 | 0 | Out |
| 96 | male   | 10 | 2013 | 28 | 42,67 | 17,00 | 0 | 0 | Out |
| 96 | male   | 12 | 2013 | 28 | 42,67 | 32,00 | 2 | 0 | Out |
| 97 | male   | 11 | 2009 | 23 | 21,78 | 31,88 | 0 | 0 | Out |
| 97 | male   | 4  | 2010 | 24 | 22,09 | 52,33 | 1 | 1 | Out |
| 97 | male   | 10 | 2010 | 24 | 22,09 | 29,70 | 0 | 0 | Out |
| 97 | male   | 2  | 2011 | 25 | 22,09 | 24,30 | 0 | 0 | Out |
| 97 | male   | 4  | 2011 | 25 | 22,09 | 85,10 | 1 | 0 | Out |
| 97 | male   | 7  | 2011 | 25 | 22,09 | 45,50 | 0 | 1 | Out |
| 97 | male   | 11 | 2011 | 25 | 22,35 | 47,70 | 0 | 0 | Out |
| 97 | male   | 4  | 2012 | 26 | 22,35 | 56,30 | 1 | 1 | Out |
| 97 | male   | 11 | 2012 | 25 | 22,35 | 36,20 | 0 | 0 | Out |
| 97 | male   | 4  | 2013 | 25 | 22,35 | 57,00 | 1 | 1 | Out |
| 97 | male   | 11 | 2013 | 25 | 22,35 | 28,00 | 0 | 0 | Out |
| 97 | male   | 12 | 2014 | 26 | 23,29 | 29,60 | 2 | 0 | Out |
| 98 | male   | 2  | 2011 | 22 | 22,27 | 34,00 | 0 | 0 | Out |
| 98 | male   | 3  | 2011 | 23 | 22,27 | 22,60 | 0 | 0 | Out |
| 98 | male   | 5  | 2012 | 24 | 22,27 | 53,60 | 1 | 1 | Out |
| 98 | male   | 1  | 2013 | 25 | 22,27 | 43,90 | 1 | 0 | Out |
| 98 | male   | 3  | 2013 | 25 | 22,27 | 41,00 | 1 | 1 | Out |
| 98 | male   | 5  | 2013 | 25 | 22,27 | 38,00 | 1 | 1 | Out |
| 98 | male   | 12 | 2013 | 25 | 22,27 | 31,00 | 0 | 0 | Out |
| 98 | male   | 4  | 2014 | 26 | 22,27 | 30,70 | 0 | 0 | Out |
| 98 | male   | 6  | 2014 | 26 | 22,27 | 33,00 | 0 | 0 | Out |
| 98 | male   | 10 | 2014 | 26 | 22,27 | 38,90 | 0 | 0 | Out |
| 98 | male   | 1  | 2015 | 25 | 22,27 | 64,00 | 1 | 0 | Out |
| 99 | male   | 4  | 2012 | 20 | 27,98 | 29,50 | 0 | 0 | Out |
| 99 | male   | 12 | 2012 | 20 | 27,98 | 24,80 | 0 | 0 | Out |
| 99 | male   | 1  | 2013 | 21 | 27,98 | 32,90 | 2 | 0 | Out |
| 99 | male   | 3  | 2013 | 21 | 27,98 | 36,00 | 2 | 0 | Out |
| 99 | male   | 5  | 2013 | 21 | 27,98 | 32,00 | 2 | 0 | Out |

|     |      |    |      |    |       |       |   |   |     |
|-----|------|----|------|----|-------|-------|---|---|-----|
| 99  | male | 10 | 2013 | 21 | 27,98 | 32,00 | 2 | 0 | Out |
| 99  | male | 12 | 2013 | 21 | 27,98 | 40,00 | 2 | 0 | Out |
| 99  | male | 5  | 2014 | 22 | 27,98 | 39,10 | 2 | 0 | Out |
| 99  | male | 12 | 2014 | 22 | 27,98 | 30,80 | 0 | 0 | Out |
| 100 | male | 6  | 2012 | 25 | 27,25 | 36,00 | 0 | 0 | Out |
| 100 | male | 1  | 2013 | 26 | 27,25 | 28,30 | 1 | 0 | Out |
| 100 | male | 5  | 2013 | 26 | 27,25 | 49,00 | 1 | 1 | Out |
| 100 | male | 11 | 2013 | 26 | 27,25 | 26,00 | 0 | 0 | Out |
| 100 | male | 8  | 2014 | 27 | 27,25 | 67,40 | 0 | 0 | Out |
| 100 | male | 2  | 2015 | 28 | 27,25 | 47,90 | 2 | 0 | Out |
| 101 | male | 4  | 2010 | 21 | 23,13 | 28,77 | 1 | 0 | Out |
| 101 | male | 10 | 2010 | 21 | 23,08 | 23,37 | 0 | 0 | Out |
| 101 | male | 2  | 2011 | 22 | 22,82 | 38,60 | 1 | 1 | Out |
| 101 | male | 3  | 2011 | 22 | 22,82 | 23,80 | 0 | 0 | Out |
| 101 | male | 2  | 2012 | 23 | 22,82 | 54,80 | 1 | 1 | Out |
| 101 | male | 2  | 2013 | 24 | 22,82 | 48,00 | 1 | 1 | Out |
| 101 | male | 4  | 2013 | 24 | 22,82 | 39,00 | 1 | 1 | Out |
| 101 | male | 12 | 2013 | 24 | 22,82 | 37,00 | 0 | 0 | Out |
| 101 | male | 6  | 2014 | 25 | 22,82 | 32,20 | 0 | 0 | Out |
| 101 | male | 11 | 2014 | 25 | 22,82 | 27,80 | 0 | 0 | Out |
| 101 | male | 12 | 2014 | 25 | 22,82 | 24,10 | 0 | 0 | Out |
| 102 | male | 10 | 2010 | 21 | 21,71 | 22,15 | 0 | 0 | Out |
| 102 | male | 6  | 2012 | 23 | 21,71 | 39,40 | 0 | 1 | Out |
| 102 | male | 1  | 2013 | 24 | 21,71 | 27,50 | 1 | 0 | Out |
| 102 | male | 4  | 2013 | 24 | 21,71 | 29,00 | 1 | 1 | Out |
| 102 | male | 10 | 2013 | 24 | 21,71 | 24,00 | 0 | 0 | Out |
| 102 | male | 12 | 2013 | 24 | 21,71 | 34,00 | 2 | 0 | Out |
| 102 | male | 8  | 2014 | 25 | 21,71 | 43,10 | 0 | 0 | Out |
| 102 | male | 11 | 2014 | 25 | 21,71 | 31,80 | 0 | 0 | Out |
| 102 | male | 12 | 2014 | 25 | 21,71 | 36,70 | 2 | 0 | Out |
| 102 | male | 1  | 2015 | 26 | 21,71 | 43,00 | 1 | 2 | Out |
| 103 | male | 1  | 2010 | 24 | 22,98 | 20,94 | 0 | 0 | Out |
| 103 | male | 7  | 2010 | 24 | 22,88 | 25,49 | 0 | 0 | Out |
| 103 | male | 11 | 2010 | 24 | 22,88 | 19,44 | 0 | 0 | Out |
| 103 | male | 6  | 2011 | 25 | 22,88 | 44,60 | 0 | 1 | Out |
| 103 | male | 6  | 2012 | 26 | 22,88 | 41,30 | 0 | 1 | Out |
| 103 | male | 7  | 2012 | 26 | 22,88 | 38,40 | 0 | 1 | Out |
| 103 | male | 1  | 2013 | 27 | 22,88 | 26,90 | 1 | 0 | Out |
| 103 | male | 5  | 2013 | 27 | 22,88 | 44,00 | 1 | 1 | Out |
| 103 | male | 8  | 2014 | 28 | 22,88 | 48,50 | 0 | 0 | Out |
| 104 | male | 10 | 2014 | 21 | 21,42 | 48,60 | 0 | 0 | Out |

|     |        |    |      |    |       |       |   |   |     |
|-----|--------|----|------|----|-------|-------|---|---|-----|
| 105 | male   | 12 | 2009 | 23 | 21,71 | 19,99 | 0 | 0 | Out |
| 105 | male   | 3  | 2010 | 25 | 21,71 | 37,70 | 1 | 1 | Out |
| 105 | male   | 4  | 2010 | 25 | 21,71 | 49,10 | 1 | 1 | Out |
| 105 | male   | 6  | 2010 | 24 | 21,86 | 26,15 | 0 | 1 | Out |
| 105 | male   | 6  | 2010 | 25 | 21,71 | 37,40 | 0 | 1 | Out |
| 105 | male   | 7  | 2010 | 24 | 21,74 | 27,12 | 0 | 1 | Out |
| 105 | male   | 8  | 2010 | 24 | 21,71 | 29,85 | 0 | 0 | Out |
| 105 | male   | 10 | 2010 | 24 | 21,71 | 20,95 | 0 | 0 | Out |
| 105 | male   | 2  | 2011 | 25 | 21,71 | 22,40 | 0 | 0 | Out |
| 105 | male   | 10 | 2011 | 26 | 21,71 | 19,60 | 0 | 0 | Out |
| 105 | male   | 6  | 2012 | 27 | 21,71 | 37,00 | 0 | 1 | Out |
| 105 | male   | 7  | 2012 | 27 | 21,71 | 35,80 | 0 | 1 | Out |
| 105 | male   | 1  | 2013 | 28 | 21,71 | 22,90 | 0 | 0 | Out |
| 105 | male   | 2  | 2013 | 28 | 21,71 | 21,00 | 0 | 0 | Out |
| 105 | male   | 5  | 2013 | 28 | 21,71 | 40,00 | 1 | 1 | Out |
| 105 | male   | 10 | 2013 | 28 | 21,71 | 41,00 | 2 | 0 | Out |
| 105 | male   | 10 | 2013 | 28 | 21,71 | 19,00 | 0 | 0 | Out |
| 105 | male   | 11 | 2013 | 28 | 21,71 | 42,00 | 2 | 0 | Out |
| 105 | male   | 5  | 2014 | 29 | 21,71 | 37,00 | 2 | 0 | Out |
| 105 | male   | 10 | 2014 | 29 | 21,71 | 34,30 | 0 | 0 | Out |
| 106 | male   | 3  | 2012 | 24 | 22,71 | 58,70 | 1 | 1 | Out |
| 106 | male   | 4  | 2012 | 24 | 22,71 | 51,70 | 1 | 1 | Out |
| 106 | male   | 11 | 2012 | 24 | 22,71 | 45,30 | 0 | 0 | Out |
| 107 | male   | 6  | 2012 | 24 | 22,71 | 36,70 | 0 | 0 | Out |
| 108 | male   | 4  | 2013 | 19 | 22,63 | 13,00 | 0 | 0 | Out |
| 108 | male   | 12 | 2013 | 19 | 22,63 | 23,00 | 0 | 0 | Out |
| 109 | female | 1  | 2011 | 26 | 17,96 | 74,00 | 1 | 0 | Out |
| 109 | female | 5  | 2011 | 26 | 17,78 | 48,50 | 1 | 0 | Out |
| 110 | female | 1  | 2013 | 21 | 23,97 | 24,40 | 0 | 0 | Out |
| 111 | female | 6  | 2010 | 23 | 18,82 | 25,08 | 0 | 0 | Out |
| 112 | female | 1  | 2013 | 28 | 17,98 | 40,60 | 2 | 0 | Out |
| 112 | male   | 4  | 2013 | 28 | 17,98 | 22,00 | 0 | 0 | Out |
| 112 | female | 2  | 2015 | 30 | 17,98 | 28,70 | 0 | 0 | Out |
| 113 | male   | 8  | 2014 | 28 | 22,54 | 25,20 | 0 | 0 | Out |
| 114 | male   | 3  | 2011 | 24 | 20,42 | 57,80 | 1 | 1 | Out |
| 114 | male   | 6  | 2011 | 24 | 20,42 | 42,00 | 0 | 1 | Out |
| 114 | male   | 8  | 2011 | 24 | 20,42 | 45,30 | 0 | 1 | Out |
| 114 | male   | 1  | 2012 | 25 | 20,42 | 65,20 | 1 | 0 | Out |
| 114 | male   | 3  | 2013 | 26 | 20,42 | 57,00 | 1 | 1 | Out |
| 114 | male   | 10 | 2013 | 26 | 20,42 | 29,00 | 0 | 0 | Out |
| 114 | male   | 12 | 2013 | 26 | 20,42 | 62,00 | 1 | 0 | Out |

|     |        |    |      |    |       |       |   |   |     |
|-----|--------|----|------|----|-------|-------|---|---|-----|
| 115 | female | 4  | 2014 | 28 | 19,94 | 26,10 | 0 | 0 | Out |
| 115 | female | 10 | 2014 | 28 | 19,94 | 38,40 | 0 | 0 | Out |
| 116 | female | 7  | 2011 | 25 | 19,33 | 21,90 | 0 | 0 | Out |
| 116 | female | 5  | 2012 | 26 | 19,33 | 44,10 | 1 | 1 | Out |
| 117 | female | 4  | 2014 | 24 | 19,95 | 49,70 | 1 | 0 | Out |
| 117 | female | 11 | 2014 | 24 | 19,95 | 30,30 | 0 | 0 | Out |
| 117 | female | 11 | 2014 | 24 | 19,95 | 33,50 | 0 | 0 | Out |
| 117 | female | 12 | 2014 | 24 | 19,95 | 42,80 | 2 | 0 | Out |
| 117 | female | 1  | 2015 | 25 | 19,95 | 67,80 | 1 | 2 | Out |
| 118 | male   | 2  | 2013 | 21 | 24,96 | 34,00 | 0 | 0 | Out |
| 118 | male   | 1  | 2014 | 22 | 24,96 | 36,00 | 2 | 0 | Out |
| 118 | male   | 11 | 2014 | 22 | 24,96 | 24,00 | 0 | 0 | Out |
| 119 | female | 8  | 2011 | 35 | 24,34 | 33,00 | 0 | 0 | Out |
| 119 | female | 3  | 2013 | 37 | 24,34 | 12,00 | 0 | 0 | Out |
| 120 | male   | 12 | 2009 | 28 | 33,88 | 26,07 | 0 | 0 | Out |
| 120 | male   | 4  | 2010 | 29 | 38,11 | 34,79 | 1 | 1 | Out |
| 120 | male   | 6  | 2010 | 29 | 33,64 | 28,55 | 0 | 0 | Out |
| 120 | male   | 11 | 2010 | 29 | 33,64 | 19,13 | 0 | 0 | Out |
| 120 | male   | 1  | 2011 | 30 | 33,64 | 19,20 | 0 | 0 | Out |
| 120 | male   | 4  | 2011 | 30 | 33,64 | 35,40 | 1 | 0 | Out |
| 120 | male   | 6  | 2011 | 30 | 34,60 | 30,10 | 0 | 0 | Out |
| 120 | male   | 10 | 2011 | 30 | 33,33 | 30,70 | 2 | 0 | Out |
| 120 | male   | 4  | 2012 | 31 | 33,33 | 48,50 | 1 | 0 | Out |
| 120 | male   | 5  | 2012 | 31 | 33,33 | 37,50 | 1 | 0 | Out |
| 120 | male   | 3  | 2013 | 32 | 33,33 | 13,00 | 0 | 0 | Out |
| 120 | male   | 1  | 2014 | 33 | 33,33 | 27,00 | 0 | 0 | Out |
| 120 | male   | 5  | 2014 | 33 | 33,33 | 24,70 | 0 | 0 | Out |
| 120 | male   | 10 | 2014 | 33 | 33,33 | 16,90 | 0 | 0 | Out |
| 120 | male   | 12 | 2014 | 33 | 33,33 | 22,50 | 0 | 0 | Out |
| 121 | female | 2  | 2015 | 21 | 34,15 | 12,10 | 0 | 0 | Out |
| 122 | male   | 4  | 2011 | 28 | 35,81 | 27,90 | 0 | 1 | Out |
| 122 | male   | 8  | 2011 | 28 | 35,81 | 24,80 | 0 | 0 | Out |
| 122 | male   | 2  | 2012 | 29 | 35,81 | 62,30 | 1 | 1 | Out |
| 122 | male   | 3  | 2012 | 29 | 35,81 | 57,40 | 1 | 1 | Out |
| 122 | male   | 6  | 2012 | 29 | 35,81 | 49,20 | 0 | 0 | Out |
| 122 | male   | 5  | 2013 | 30 | 35,81 | 29,00 | 0 | 1 | Out |
| 122 | male   | 2  | 2014 | 31 | 35,81 | 36,00 | 1 | 0 | Out |
| 123 | male   | 11 | 2009 | 27 | 24,76 | 36,63 | 0 | 0 | Out |
| 123 | male   | 4  | 2010 | 28 | 23,69 | 35,62 | 1 | 0 | Out |
| 123 | male   | 10 | 2010 | 28 | 24,78 | 28,47 | 0 | 0 | Out |
| 123 | male   | 2  | 2011 | 29 | 25,08 | 32,30 | 1 | 0 | Out |

|     |        |    |      |    |       |       |   |   |     |
|-----|--------|----|------|----|-------|-------|---|---|-----|
| 123 | male   | 4  | 2011 | 29 | 25,08 | 29,10 | 1 | 0 | Out |
| 123 | male   | 7  | 2011 | 29 | 25,08 | 38,30 | 0 | 1 | Out |
| 123 | male   | 2  | 2012 | 30 | 25,08 | 45,70 | 1 | 0 | Out |
| 123 | male   | 11 | 2012 | 30 | 25,08 | 27,00 | 0 | 0 | Out |
| 123 | male   | 2  | 2013 | 31 | 25,08 | 45,00 | 1 | 0 | Out |
| 123 | male   | 7  | 2013 | 31 | 25,08 | 36,00 | 0 | 0 | Out |
| 123 | male   | 12 | 2013 | 31 | 25,08 | 22,00 | 0 | 0 | Out |
| 123 | male   | 7  | 2014 | 32 | 25,08 | 30,20 | 0 | 0 | Out |
| 124 | female | 10 | 2012 | 18 | 21,71 | 22,80 | 0 | 0 | Out |
| 124 | female | 1  | 2013 | 19 | 21,71 | 35,40 | 2 | 0 | Out |
| 124 | female | 9  | 2013 | 19 | 21,71 | 41,00 | 2 | 0 | Out |
| 124 | female | 12 | 2013 | 19 | 21,71 | 25,00 | 0 | 0 | Out |
| 125 | male   | 5  | 2010 | 26 | 22,98 | 57,90 | 1 | 1 | Out |
| 125 | male   | 7  | 2011 | 27 | 22,98 | 46,30 | 0 | 1 | Out |
| 125 | male   | 11 | 2011 | 27 | 22,98 | 47,80 | 2 | 0 | Out |
| 125 | male   | 2  | 2012 | 28 | 22,98 | 58,10 | 2 | 0 | Out |
| 125 | male   | 11 | 2012 | 28 | 22,98 | 63,00 | 2 | 0 | Out |
| 125 | male   | 4  | 2013 | 29 | 22,98 | 65,00 | 1 | 0 | Out |
| 125 | male   | 5  | 2014 | 30 | 22,98 | 53,40 | 1 | 0 | Out |
| 125 | male   | 7  | 2014 | 30 | 22,98 | 49,10 | 2 | 0 | Out |
| 125 | male   | 2  | 2015 | 31 | 22,98 | 36,60 | 2 | 0 | Out |
| 126 | male   | 11 | 2012 | 17 | 20,87 | 17,50 | 0 | 0 | Out |
| 127 | female | 3  | 2012 | 24 | 20,77 | 71,20 | 1 | 0 | Out |
| 127 | female | 4  | 2012 | 24 | 20,77 | 55,70 | 1 | 0 | Out |
| 127 | female | 12 | 2014 | 26 | 20,77 | 31,90 | 2 | 0 | Out |
| 128 | male   | 3  | 2013 | 19 | 23,30 | 19,00 | 0 | 0 | Out |
| 129 | male   | 8  | 2011 | 23 | 24,21 | 43,60 | 0 | 0 | Out |
| 129 | male   | 7  | 2012 | 24 | 24,21 | 35,20 | 0 | 0 | Out |
| 130 | female | 11 | 2014 | 22 | 20,44 | 24,90 | 0 | 0 | Out |
| 131 | female | 6  | 2012 | 22 | 19,95 | 37,20 | 0 | 0 | Out |
| 131 | female | 7  | 2014 | 24 | 19,95 | 48,60 | 2 | 0 | Out |
| 132 | male   | 8  | 2010 | 23 | 34,18 | 29,80 | 0 | 0 | Out |
| 133 | male   | 2  | 2010 | 21 | 22,76 | 25,49 | 0 | 0 | Out |
| 134 | male   | 12 | 2009 | 21 | 23,95 | 23,78 | 0 | 0 | Out |
| 134 | male   | 3  | 2010 | 22 | 23,95 | 19,40 | 0 | 0 | Out |
| 134 | male   | 4  | 2010 | 22 | 23,93 | 42,79 | 1 | 0 | Out |
| 134 | male   | 6  | 2010 | 22 | 23,96 | 36,11 | 0 | 1 | Out |
| 134 | male   | 7  | 2010 | 22 | 24,73 | 30,52 | 0 | 1 | Out |
| 134 | male   | 10 | 2010 | 22 | 24,60 | 32,12 | 0 | 0 | Out |
| 134 | male   | 11 | 2010 | 22 | 25,51 | 32,74 | 0 | 0 | Out |
| 134 | male   | 1  | 2011 | 23 | 25,51 | 37,90 | 1 | 0 | Out |

|     |        |    |      |    |       |       |   |   |     |
|-----|--------|----|------|----|-------|-------|---|---|-----|
| 134 | male   | 3  | 2011 | 23 | 25,51 | 28,70 | 0 | 1 | Out |
| 134 | male   | 5  | 2011 | 23 | 23,45 | 46,40 | 1 | 1 | Out |
| 134 | male   | 11 | 2011 | 23 | 23,95 | 49,20 | 0 | 0 | Out |
| 134 | male   | 2  | 2012 | 24 | 23,95 | 39,50 | 2 | 0 | Out |
| 134 | male   | 3  | 2012 | 24 | 23,95 | 27,30 | 2 | 0 | Out |
| 134 | male   | 4  | 2012 | 24 | 23,95 | 27,30 | 2 | 0 | Out |
| 134 | male   | 4  | 2012 | 24 | 23,95 | 41,10 | 1 | 0 | Out |
| 134 | male   | 7  | 2012 | 24 | 23,95 | 40,20 | 0 | 0 | Out |
| 134 | male   | 11 | 2012 | 24 | 23,95 | 32,30 | 2 | 0 | Out |
| 134 | male   | 1  | 2013 | 25 | 23,95 | 41,00 | 1 | 0 | Out |
| 134 | male   | 2  | 2013 | 25 | 23,95 | 63,00 | 1 | 0 | Out |
| 134 | male   | 3  | 2013 | 25 | 23,95 | 56,00 | 1 | 0 | Out |
| 134 | male   | 4  | 2013 | 25 | 23,95 | 44,00 | 1 | 1 | Out |
| 134 | male   | 7  | 2013 | 25 | 23,95 | 44,00 | 0 | 1 | Out |
| 134 | male   | 11 | 2013 | 25 | 23,95 | 30,00 | 0 | 0 | Out |
| 134 | male   | 3  | 2014 | 26 | 23,95 | 19,00 | 0 | 0 | Out |
| 134 | male   | 10 | 2014 | 26 | 23,95 | 39,50 | 0 | 0 | Out |
| 135 | male   | 1  | 2013 | 24 | 17,41 | 11,20 | 0 | 0 | Out |
| 136 | male   | 11 | 2010 | 22 | 21,61 | 18,11 | 0 | 0 | Out |
| 136 | male   | 1  | 2011 | 23 | 21,61 | 30,90 | 1 | 0 | Out |
| 136 | male   | 5  | 2011 | 23 | 20,83 | 28,30 | 0 | 1 | Out |
| 136 | male   | 11 | 2012 | 24 | 20,83 | 28,70 | 0 | 0 | Out |
| 136 | male   | 7  | 2014 | 26 | 20,83 | 44,80 | 0 | 0 | Out |
| 136 | male   | 12 | 2014 | 26 | 20,83 | 25,60 | 0 | 0 | Out |
| 137 | male   | 11 | 2010 | 26 | 21,65 | 18,86 | 0 | 0 | Out |
| 137 | male   | 2  | 2011 | 27 | 21,65 | 42,70 | 1 | 0 | Out |
| 137 | male   | 3  | 2011 | 27 | 21,65 | 27,30 | 0 | 0 | Out |
| 137 | male   | 5  | 2012 | 28 | 21,65 | 51,70 | 1 | 1 | Out |
| 137 | male   | 2  | 2013 | 29 | 21,65 | 38,00 | 0 | 0 | Out |
| 137 | male   | 11 | 2013 | 29 | 21,65 | 29,00 | 0 | 0 | Out |
| 138 | male   | 11 | 2014 | 20 | 26,88 | 17,50 | 0 | 0 | Out |
| 139 | male   | 2  | 2013 | 24 | 30,69 | 28,00 | 0 | 0 | Out |
| 139 | male   | 7  | 2013 | 24 | 30,69 | 29,00 | 0 | 0 | Out |
| 140 | male   | 2  | 2013 | 19 | 37,09 | 17,00 | 0 | 0 | Out |
| 140 | male   | 12 | 2014 | 20 | 37,09 | 17,80 | 0 | 0 | Out |
| 141 | female | 6  | 2010 | 19 | 32,49 | 27,12 | 0 | 0 | Out |
| 142 | female | 10 | 2014 | 21 | 20,06 | 29,90 | 0 | 0 | Out |
| 143 | male   | 5  | 2013 | 21 | 22,69 | 42,00 | 1 | 1 | Out |
| 143 | male   | 11 | 2013 | 21 | 22,69 | 15,00 | 0 | 0 | Out |
| 143 | male   | 1  | 2014 | 22 | 22,69 | 32,00 | 2 | 0 | Out |
| 143 | male   | 5  | 2014 | 22 | 22,69 | 31,30 | 1 | 0 | Out |



|     |        |    |      |    |       |       |   |   |     |
|-----|--------|----|------|----|-------|-------|---|---|-----|
| 143 | male   | 10 | 2014 | 22 | 22,69 | 23,20 | 0 | 0 | Out |
| 144 | male   | 11 | 2010 | 21 | 20,16 | 18,90 | 0 | 0 | Out |
| 144 | male   | 1  | 2013 | 24 | 20,16 | 39,70 | 1 | 0 | Out |
| 144 | male   | 5  | 2013 | 24 | 20,16 | 43,00 | 1 | 1 | Out |
| 144 | male   | 7  | 2013 | 24 | 20,16 | 38,00 | 0 | 1 | Out |
| 144 | male   | 4  | 2014 | 25 | 20,16 | 41,30 | 1 | 0 | Out |
| 144 | male   | 10 | 2014 | 25 | 20,16 | 32,00 | 0 | 0 | Out |
| 144 | male   | 12 | 2014 | 25 | 20,16 | 38,10 | 2 | 0 | Out |
| 144 | male   | 1  | 2015 | 26 | 20,16 | 54,00 | 1 | 2 | Out |
| 145 | female | 6  | 2011 | 20 | 20,92 | 41,70 | 0 | 1 | Out |
| 145 | female | 7  | 2012 | 21 | 20,92 | 41,00 | 0 | 1 | Out |
| 145 | female | 1  | 2013 | 22 | 20,92 | 31,10 | 1 | 0 | Out |
| 145 | female | 7  | 2013 | 22 | 20,92 | 32,00 | 0 | 1 | Out |
| 145 | female | 11 | 2013 | 22 | 20,92 | 22,00 | 0 | 0 | Out |
| 146 | male   | 6  | 2012 | 21 | 28,77 | 15,80 | 0 | 0 | Out |
| 146 | male   | 12 | 2012 | 21 | 28,77 | 14,20 | 0 | 0 | Out |
| 147 | male   | 11 | 2012 | 24 | 18,17 | 19,90 | 0 | 0 | Out |
| 147 | male   | 1  | 2013 | 25 | 18,17 | 26,70 | 2 | 0 | Out |
| 147 | male   | 3  | 2013 | 25 | 18,17 | 48,00 | 2 | 0 | Out |
| 147 | male   | 4  | 2013 | 25 | 18,17 | 40,00 | 2 | 0 | Out |
| 147 | male   | 5  | 2013 | 25 | 18,17 | 37,00 | 2 | 0 | Out |
| 147 | male   | 11 | 2013 | 25 | 18,17 | 30,00 | 0 | 0 | Out |
| 147 | male   | 12 | 2013 | 25 | 18,17 | 36,00 | 2 | 0 | Out |
| 147 | male   | 4  | 2014 | 26 | 18,17 | 21,10 | 0 | 0 | Out |
| 147 | male   | 5  | 2014 | 26 | 18,17 | 42,00 | 2 | 0 | Out |
| 148 | male   | 6  | 2012 | 23 | 19,38 | 35,00 | 1 | 0 | Out |
| 148 | male   | 1  | 2013 | 24 | 19,38 | 25,50 | 0 | 0 | Out |
| 149 | male   | 11 | 2010 | 23 | 21,33 | 23,35 | 0 | 0 | Out |
| 150 | male   | 11 | 2010 | 25 | 21,11 | 19,72 | 0 | 0 | Out |
| 150 | male   | 2  | 2011 | 26 | 21,14 | 25,00 | 0 | 0 | Out |
| 150 | male   | 4  | 2011 | 26 | 21,14 | 36,70 | 1 | 0 | Out |
| 150 | male   | 6  | 2011 | 26 | 20,99 | 35,70 | 0 | 1 | Out |
| 150 | male   | 4  | 2012 | 27 | 20,99 | 32,80 | 1 | 1 | Out |
| 150 | male   | 5  | 2012 | 27 | 20,99 | 44,80 | 0 | 1 | Out |
| 150 | male   | 12 | 2012 | 27 | 20,99 | 39,00 | 0 | 0 | Out |
| 150 | male   | 4  | 2013 | 28 | 20,99 | 34,00 | 2 | 0 | Out |
| 150 | male   | 5  | 2013 | 28 | 20,99 | 30,00 | 2 | 0 | Out |
| 150 | male   | 7  | 2013 | 28 | 20,99 | 36,00 | 0 | 0 | Out |
| 150 | male   | 1  | 2014 | 29 | 20,99 | 29,00 | 0 | 0 | Out |
| 150 | male   | 6  | 2014 | 29 | 20,99 | 29,50 | 0 | 0 | Out |
| 150 | male   | 11 | 2014 | 29 | 20,99 | 31,50 | 0 | 0 | Out |

|     |        |    |      |    |       |       |   |   |     |
|-----|--------|----|------|----|-------|-------|---|---|-----|
| 151 | male   | 1  | 2010 | 22 | 24,91 | 22,87 | 0 | 0 | Out |
| 151 | male   | 7  | 2010 | 22 | 24,91 | 28,18 | 0 | 0 | Out |
| 151 | male   | 11 | 2010 | 22 | 24,91 | 22,16 | 0 | 0 | Out |
| 151 | male   | 2  | 2011 | 23 | 25,71 | 25,40 | 0 | 0 | Out |
| 151 | male   | 4  | 2011 | 23 | 25,71 | 39,00 | 1 | 0 | Out |
| 151 | male   | 6  | 2011 | 23 | 25,71 | 43,90 | 0 | 1 | Out |
| 151 | male   | 3  | 2012 | 24 | 25,71 | 14,20 | 0 | 0 | Out |
| 152 | male   | 11 | 2012 | 18 | 19,43 | 26,60 | 0 | 0 | Out |
| 153 | male   | 8  | 2014 | 22 | 24,81 | 57,00 | 0 | 0 | Out |
| 154 | male   | 5  | 2012 | 23 | 23,63 | 58,70 | 1 | 1 | Out |
| 154 | male   | 12 | 2012 | 23 | 23,63 | 33,40 | 0 | 0 | Out |
| 154 | male   | 11 | 2014 | 25 | 23,63 | 22,30 | 0 | 0 | Out |
| 155 | female | 11 | 2010 | 27 | 23,42 | 24,44 | 0 | 0 | Out |
| 155 | female | 5  | 2011 | 27 | 22,41 | 27,00 | 0 | 0 | Out |
| 156 | female | 11 | 2009 | 26 | 21,05 | 44,57 | 0 | 0 | Out |
| 156 | female | 11 | 2010 | 27 | 21,96 | 37,16 | 0 | 0 | Out |
| 156 | female | 5  | 2011 | 27 | 22,05 | 26,20 | 0 | 0 | Out |
| 156 | female | 11 | 2011 | 27 | 22,09 | 44,00 | 0 | 0 | Out |
| 156 | female | 5  | 2012 | 28 | 22,09 | 56,40 | 0 | 1 | Out |
| 157 | male   | 7  | 2011 | 30 | 21,74 | 42,70 | 0 | 1 | Out |
| 157 | male   | 5  | 2012 | 31 | 21,74 | 49,40 | 1 | 1 | Out |
| 157 | male   | 2  | 2013 | 33 | 21,74 | 29,00 | 0 | 0 | Out |
| 158 | male   | 12 | 2012 | 22 | 28,91 | 28,70 | 0 | 0 | Out |
| 159 | female | 11 | 2010 | 25 | 17,95 | 13,79 | 0 | 0 | Out |
| 159 | female | 2  | 2011 | 26 | 17,88 | 48,60 | 1 | 0 | Out |
| 159 | female | 6  | 2011 | 26 | 17,88 | 29,10 | 0 | 1 | Out |
| 159 | female | 4  | 2012 | 27 | 17,88 | 22,20 | 0 | 0 | Out |
| 159 | female | 2  | 2013 | 28 | 17,88 | 25,00 | 0 | 1 | Out |
| 159 | female | 3  | 2013 | 28 | 17,88 | 25,00 | 0 | 1 | Out |
| 159 | female | 12 | 2014 | 29 | 17,88 | 17,70 | 0 | 0 | Out |
| 159 | female | 2  | 2015 | 30 | 17,88 | 32,90 | 1 | 0 | Out |
| 160 | female | 12 | 2009 | 21 | 20,90 | 35,64 | 0 | 0 | Out |
| 160 | female | 5  | 2010 | 22 | 20,17 | 42,12 | 1 | 0 | Out |
| 160 | female | 6  | 2010 | 22 | 20,17 | 26,82 | 0 | 0 | Out |
| 160 | female | 11 | 2010 | 22 | 20,63 | 26,59 | 0 | 0 | Out |
| 160 | female | 5  | 2011 | 23 | 20,37 | 33,90 | 1 | 0 | Out |
| 160 | female | 12 | 2011 | 23 | 19,78 | 30,40 | 0 | 0 | Out |
| 161 | female | 5  | 2010 | 22 | 19,95 | 29,70 | 1 | 0 | Out |
| 161 | female | 6  | 2010 | 22 | 19,61 | 23,62 | 0 | 1 | Out |
| 161 | female | 7  | 2010 | 22 | 19,87 | 24,63 | 0 | 0 | Out |
| 161 | female | 9  | 2010 | 22 | 19,87 | 21,79 | 0 | 0 | Out |

|     |        |    |      |    |       |       |   |   |     |
|-----|--------|----|------|----|-------|-------|---|---|-----|
| 161 | female | 10 | 2010 | 22 | 19,87 | 18,55 | 0 | 0 | Out |
| 161 | female | 12 | 2010 | 22 | 20,14 | 17,41 | 0 | 0 | Out |
| 161 | female | 1  | 2011 | 23 | 20,14 | 18,12 | 0 | 0 | Out |
| 161 | female | 2  | 2011 | 23 | 20,14 | 37,70 | 1 | 0 | Out |
| 161 | female | 4  | 2011 | 23 | 20,32 | 35,10 | 1 | 1 | Out |
| 161 | female | 7  | 2011 | 23 | 20,85 | 39,10 | 0 | 1 | Out |
| 161 | female | 1  | 2012 | 24 | 20,85 | 27,60 | 0 | 0 | Out |
| 161 | female | 4  | 2012 | 24 | 20,85 | 45,20 | 1 | 1 | Out |
| 161 | female | 5  | 2012 | 24 | 20,85 | 37,70 | 1 | 1 | Out |
| 161 | female | 7  | 2012 | 24 | 20,85 | 31,10 | 1 | 1 | Out |
| 161 | female | 11 | 2014 | 24 | 20,85 | 24,00 | 0 | 0 | Out |
| 162 | female | 11 | 2010 | 30 | 29,57 | 36,24 | 0 | 0 | Out |
| 163 | male   | 2  | 2015 | 22 | 28,98 | 12,20 | 0 | 0 | Out |
| 164 | female | 11 | 2014 | 22 | 30,87 | 17,70 | 0 | 0 | Out |
| 165 | female | 12 | 2009 | 22 | 21,40 | 31,03 | 0 | 0 | Out |
| 165 | female | 5  | 2010 | 23 | 20,52 | 28,56 | 1 | 0 | Out |
| 165 | female | 6  | 2010 | 23 | 20,52 | 29,07 | 0 | 1 | Out |
| 165 | female | 7  | 2010 | 23 | 20,52 | 25,28 | 0 | 0 | Out |
| 165 | female | 11 | 2010 | 23 | 20,52 | 36,16 | 2 | 0 | Out |
| 165 | female | 1  | 2011 | 24 | 20,82 | 33,47 | 2 | 0 | Out |
| 165 | female | 2  | 2011 | 24 | 20,82 | 51,70 | 1 | 0 | Out |
| 165 | female | 4  | 2011 | 24 | 21,19 | 40,30 | 1 | 1 | Out |
| 165 | female | 5  | 2011 | 24 | 21,56 | 35,50 | 1 | 1 | Out |
| 165 | female | 7  | 2011 | 24 | 21,56 | 34,00 | 0 | 1 | Out |
| 165 | female | 1  | 2012 | 25 | 21,56 | 40,40 | 1 | 0 | Out |
| 165 | female | 5  | 2012 | 25 | 21,56 | 49,80 | 1 | 1 | Out |
| 165 | female | 7  | 2012 | 25 | 21,56 | 44,80 | 0 | 1 | Out |
| 165 | female | 12 | 2012 | 25 | 21,56 | 36,70 | 2 | 0 | Out |
| 165 | female | 1  | 2013 | 26 | 21,56 | 25,50 | 0 | 0 | Out |
| 165 | female | 6  | 2013 | 26 | 21,56 | 41,00 | 0 | 1 | Out |
| 165 | female | 1  | 2014 | 27 | 21,56 | 28,00 | 0 | 0 | Out |
| 166 | female | 12 | 2009 | 29 | 19,84 | 29,86 | 0 | 0 | Out |
| 166 | female | 1  | 2010 | 30 | 19,84 | 35,01 | 0 | 0 | Out |
| 166 | female | 11 | 2010 | 30 | 19,84 | 21,97 | 0 | 0 | Out |
| 166 | female | 8  | 2011 | 31 | 20,34 | 39,10 | 0 | 0 | Out |
| 166 | female | 10 | 2011 | 31 | 20,34 | 34,80 | 0 | 0 | Out |
| 167 | male   | 11 | 2010 | 23 | 25,65 | 18,37 | 0 | 0 | Out |
| 167 | male   | 6  | 2012 | 25 | 25,65 | 41,10 | 0 | 0 | Out |
| 167 | male   | 12 | 2012 | 25 | 25,65 | 33,30 | 2 | 0 | Out |
| 167 | male   | 11 | 2014 | 27 | 25,65 | 28,00 | 0 | 0 | Out |
| 168 | male   | 7  | 2010 | 20 | 34,90 | 17,29 | 0 | 0 | Out |

|     |        |    |      |    |       |       |   |   |     |
|-----|--------|----|------|----|-------|-------|---|---|-----|
| 169 | female | 11 | 2010 | 28 | 19,74 | 18,52 | 0 | 0 | Out |
| 169 | female | 5  | 2011 | 28 | 19,49 | 48,90 | 1 | 0 | Out |
| 170 | female | 10 | 2009 | 28 | 20,36 | 36,40 | 1 | 0 | Out |
| 170 | female | 11 | 2010 | 29 | 20,40 | 30,55 | 0 | 0 | Out |
| 170 | female | 1  | 2011 | 30 | 20,41 | 48,60 | 1 | 0 | Out |
| 170 | female | 5  | 2011 | 30 | 20,41 | 47,00 | 1 | 1 | Out |
| 170 | female | 10 | 2011 | 30 | 20,40 | 48,80 | 0 | 0 | Out |
| 170 | female | 4  | 2012 | 31 | 20,40 | 58,60 | 1 | 1 | Out |
| 170 | female | 10 | 2012 | 31 | 20,40 | 52,40 | 0 | 0 | Out |
| 171 | male   | 11 | 2014 | 21 | 31,80 | 29,60 | 0 | 0 | Out |
| 171 | male   | 2  | 2015 | 22 | 31,80 | 37,20 | 2 | 0 | Out |
| 172 | female | 11 | 2012 | 32 | 19,09 | 24,20 | 0 | 0 | Out |
| 173 | male   | 2  | 2011 | 20 | 20,19 | 41,70 | 0 | 0 | Out |
| 174 | male   | 11 | 2009 | 22 | 20,35 | 30,85 | 0 | 0 | Out |
| 175 | male   | 1  | 2011 | 21 | 19,12 | 20,60 | 0 | 0 | Out |
| 176 | female | 11 | 2010 | 16 | 21,01 | 17,00 | 0 | 0 | Out |
| 176 | female | 4  | 2011 | 17 | 20,31 | 17,00 | 0 | 0 | Out |
| 177 | female | 1  | 2013 | 23 | 19,22 | 20,40 | 0 | 0 | Out |
| 178 | female | 2  | 2012 | 32 | 20,00 | 21,20 | 0 | 0 | Out |
| 179 | female | 11 | 2009 | 29 | 20,00 | 63,87 | 1 | 0 | Out |
| 179 | female | 5  | 2010 | 30 | 19,72 | 21,87 | 0 | 0 | Out |
| 179 | female | 6  | 2010 | 30 | 20,07 | 45,70 | 0 | 1 | Out |
| 179 | female | 8  | 2010 | 30 | 19,72 | 43,93 | 0 | 1 | Out |
| 179 | female | 2  | 2011 | 31 | 19,72 | 59,20 | 1 | 0 | Out |
| 179 | female | 4  | 2011 | 31 | 19,72 | 38,20 | 1 | 1 | Out |
| 179 | female | 5  | 2012 | 32 | 19,72 | 37,80 | 1 | 0 | Out |
| 180 | male   | 12 | 2013 | 30 | 19,72 | 38,00 | 2 | 0 | Out |
| 180 | male   | 4  | 2014 | 31 | 19,72 | 31,30 | 2 | 0 | Out |
| 180 | male   | 8  | 2014 | 31 | 19,72 | 44,00 | 0 | 0 | Out |
| 180 | male   | 10 | 2014 | 31 | 19,72 | 22,70 | 0 | 0 | Out |
| 180 | male   | 12 | 2014 | 31 | 19,72 | 26,80 | 0 | 0 | Out |
| 181 | male   | 11 | 2010 | 23 | 20,37 | 23,51 | 0 | 0 | Out |
| 181 | male   | 2  | 2011 | 24 | 20,65 | 43,80 | 1 | 0 | Out |
| 181 | male   | 5  | 2011 | 24 | 20,74 | 29,80 | 0 | 1 | Out |
| 181 | male   | 9  | 2011 | 24 | 21,50 | 40,90 | 2 | 0 | Out |
| 181 | male   | 11 | 2011 | 24 | 21,50 | 35,70 | 2 | 0 | Out |
| 181 | male   | 4  | 2013 | 26 | 21,50 | 44,00 | 1 | 0 | Out |
| 181 | male   | 1  | 2014 | 27 | 21,50 | 35,00 | 1 | 0 | Out |
| 181 | male   | 6  | 2014 | 27 | 21,50 | 33,70 | 0 | 0 | Out |
| 182 | female | 4  | 2010 | 25 | 20,25 | 36,85 | 1 | 0 | Out |
| 183 | male   | 11 | 2012 | 21 | 19,72 | 23,90 | 0 | 0 | Out |

|     |        |    |      |    |       |       |   |   |     |
|-----|--------|----|------|----|-------|-------|---|---|-----|
| 183 | male   | 4  | 2013 | 22 | 19,72 | 18,00 | 0 | 0 | Out |
| 184 | male   | 3  | 2014 | 21 | 22,59 | 43,00 | 2 | 0 | Out |
| 185 | male   | 10 | 2013 | 22 | 22,35 | 22,00 | 0 | 0 | Out |
| 185 | male   | 1  | 2014 | 23 | 22,35 | 38,00 | 2 | 0 | Out |
| 185 | male   | 10 | 2014 | 23 | 22,35 | 26,70 | 0 | 0 | Out |
| 185 | male   | 12 | 2014 | 23 | 22,35 | 38,10 | 2 | 0 | Out |
| 186 | female | 9  | 2010 | 24 | 22,92 | 27,41 | 0 | 0 | Out |
| 187 | male   | 3  | 2012 | 25 | 23,46 | 18,80 | 0 | 0 | Out |
| 188 | female | 1  | 2013 | 22 | 31,81 | 24,90 | 0 | 0 | Out |
| 189 | male   | 12 | 2009 | 24 | 21,45 | 29,68 | 0 | 0 | Out |
| 189 | male   | 6  | 2010 | 25 | 21,39 | 35,30 | 0 | 0 | Out |
| 189 | male   | 5  | 2011 | 26 | 21,55 | 46,80 | 2 | 0 | Out |
| 189 | male   | 1  | 2013 | 28 | 21,55 | 47,60 | 2 | 0 | Out |
| 189 | male   | 7  | 2013 | 28 | 21,55 | 41,00 | 0 | 0 | Out |
| 190 | male   | 11 | 2012 | 24 | 21,16 | 20,50 | 0 | 0 | Out |
| 190 | male   | 5  | 2013 | 25 | 21,16 | 24,00 | 0 | 0 | Out |
| 191 | male   | 5  | 2012 | 25 | 25,88 | 44,50 | 1 | 0 | Out |
| 192 | female | 1  | 2014 | 21 | 21,78 | 23,00 | 0 | 0 | Out |
| 193 | male   | 12 | 2012 | 22 | 22,25 | 12,70 | 0 | 0 | Out |
| 193 | male   | 12 | 2014 | 22 | 22,25 | 14,70 | 0 | 0 | Out |
| 194 | male   | 1  | 2010 | 32 | 20,50 | 20,71 | 0 | 0 | Out |
| 194 | male   | 2  | 2010 | 32 | 20,50 | 17,45 | 0 | 0 | Out |
| 194 | male   | 7  | 2010 | 32 | 20,50 | 22,79 | 0 | 0 | Out |
| 194 | male   | 8  | 2010 | 32 | 19,89 | 35,92 | 2 | 0 | Out |
| 194 | male   | 1  | 2011 | 33 | 20,27 | 22,30 | 0 | 0 | Out |
| 194 | male   | 4  | 2011 | 33 | 21,06 | 35,00 | 1 | 1 | Out |
| 194 | male   | 8  | 2011 | 33 | 21,06 | 38,50 | 0 | 0 | Out |
| 194 | male   | 11 | 2011 | 33 | 21,06 | 24,60 | 0 | 0 | Out |
| 194 | male   | 11 | 2012 | 34 | 21,06 | 33,00 | 2 | 0 | Out |
| 194 | male   | 6  | 2013 | 35 | 21,06 | 26,00 | 0 | 0 | Out |
| 194 | male   | 11 | 2014 | 36 | 21,06 | 24,10 | 0 | 0 | Out |
| 195 | male   | 11 | 2014 | 21 | 20,65 | 22,80 | 0 | 0 | Out |
| 196 | male   | 4  | 2013 | 20 | 23,06 | 14,00 | 0 | 0 | Out |
| 197 | male   | 5  | 2014 | 23 | 24,63 | 33,90 | 0 | 0 | Out |
| 198 | female | 6  | 2012 | 23 | 18,13 | 53,50 | 1 | 1 | Out |
| 198 | female | 11 | 2012 | 23 | 18,13 | 39,40 | 0 | 0 | Out |
| 198 | female | 6  | 2013 | 24 | 18,13 | 31,00 | 0 | 0 | Out |
| 199 | male   | 6  | 2012 | 30 | 20,39 | 23,30 | 0 | 0 | Out |
| 199 | male   | 5  | 2013 | 31 | 20,39 | 25,00 | 0 | 0 | Out |
| 199 | male   | 12 | 2014 | 32 | 20,39 | 19,40 | 0 | 0 | Out |
| 200 | female | 12 | 2009 | 22 | 20,01 | 26,82 | 0 | 0 | Out |

|     |        |    |      |    |       |        |   |   |     |
|-----|--------|----|------|----|-------|--------|---|---|-----|
| 201 | female | 11 | 2012 | 26 | 20,20 | 22,20  | 0 | 0 | Out |
| 201 | female | 4  | 2013 | 27 | 20,20 | 35,00  | 1 | 0 | Out |
| 202 | male   | 4  | 2011 | 28 | 21,07 | 63,90  | 1 | 0 | Out |
| 202 | male   | 8  | 2011 | 28 | 20,43 | 62,10  | 0 | 0 | Out |
| 202 | male   | 3  | 2012 | 29 | 20,43 | 76,30  | 1 | 0 | Out |
| 203 | male   | 10 | 2013 | 22 | 33,28 | 27,00  | 0 | 0 | Out |
| 203 | male   | 12 | 2013 | 22 | 33,28 | 26,00  | 0 | 0 | Out |
| 203 | male   | 1  | 2014 | 23 | 33,28 | 48,00  | 2 | 0 | Out |
| 203 | male   | 12 | 2014 | 23 | 33,28 | 30,60  | 0 | 0 | Out |
| 204 | male   | 11 | 2010 | 24 | 22,02 | 14,33  | 0 | 0 | Out |
| 204 | male   | 5  | 2011 | 25 | 21,95 | 24,30  | 0 | 0 | Out |
| 205 | female | 4  | 2012 | 20 | 21,05 | 43,70  | 1 | 0 | Out |
| 205 | female | 7  | 2012 | 20 | 21,05 | 37,10  | 0 | 1 | Out |
| 205 | female | 12 | 2012 | 20 | 21,05 | 27,70  | 1 | 0 | Out |
| 205 | female | 1  | 2013 | 21 | 21,05 | 44,70  | 1 | 0 | Out |
| 205 | female | 2  | 2013 | 21 | 21,05 | 48,00  | 1 | 1 | Out |
| 205 | female | 4  | 2013 | 21 | 21,05 | 55,00  | 1 | 1 | Out |
| 205 | female | 7  | 2013 | 21 | 21,05 | 31,00  | 0 | 0 | Out |
| 205 | female | 6  | 2014 | 22 | 21,05 | 57,50  | 2 | 0 | Out |
| 205 | female | 8  | 2014 | 22 | 21,05 | 77,30  | 0 | 0 | Out |
| 205 | female | 10 | 2014 | 22 | 21,05 | 35,60  | 0 | 0 | Out |
| 205 | female | 11 | 2014 | 22 | 21,05 | 24,50  | 0 | 0 | Out |
| 205 | female | 12 | 2014 | 22 | 21,05 | 50,90  | 2 | 0 | Out |
| 205 | female | 1  | 2015 | 23 | 21,05 | 108,20 | 1 | 2 | Out |
| 206 | female | 1  | 2013 | 26 | 21,07 | 42,90  | 2 | 0 | Out |
| 206 | female | 4  | 2013 | 26 | 21,07 | 37,00  | 2 | 0 | Out |
| 206 | female | 9  | 2013 | 26 | 21,07 | 43,00  | 2 | 0 | Out |
| 207 | male   | 7  | 2010 | 24 | 23,81 | 28,30  | 0 | 0 | Out |
| 207 | male   | 11 | 2010 | 24 | 23,81 | 20,45  | 0 | 0 | Out |
| 207 | male   | 5  | 2011 | 25 | 23,11 | 27,70  | 0 | 0 | Out |
| 208 | male   | 11 | 2009 | 20 | 18,72 | 63,87  | 1 | 0 | Out |
| 208 | male   | 6  | 2010 | 21 | 18,72 | 27,45  | 0 | 0 | Out |
| 208 | male   | 11 | 2010 | 21 | 18,72 | 15,43  | 0 | 0 | Out |
| 208 | male   | 12 | 2012 | 23 | 18,72 | 28,60  | 0 | 0 | Out |
| 208 | male   | 12 | 2014 | 25 | 18,72 | 25,70  | 0 | 0 | Out |
| 209 | female | 3  | 2014 | 33 | 18,94 | 23,00  | 0 | 0 | Out |
| 209 | female | 11 | 2014 | 33 | 18,94 | 27,40  | 0 | 0 | Out |
| 210 | female | 11 | 2009 | 28 | 18,94 | 27,20  | 0 | 0 | Out |
| 210 | female | 3  | 2010 | 29 | 19,27 | 27,41  | 1 | 0 | Out |
| 210 | female | 5  | 2010 | 29 | 19,27 | 21,98  | 0 | 0 | Out |
| 210 | female | 6  | 2010 | 29 | 18,51 | 32,83  | 0 | 0 | Out |

|     |        |    |      |    |       |       |   |   |     |
|-----|--------|----|------|----|-------|-------|---|---|-----|
| 210 | female | 7  | 2010 | 29 | 18,35 | 30,48 | 0 | 0 | Out |
| 210 | female | 9  | 2010 | 29 | 18,87 | 21,50 | 0 | 0 | Out |
| 210 | female | 10 | 2010 | 29 | 18,87 | 35,49 | 0 | 0 | Out |
| 210 | female | 12 | 2010 | 29 | 18,87 | 24,92 | 0 | 0 | Out |
| 210 | female | 1  | 2011 | 30 | 19,59 | 25,41 | 0 | 0 | Out |
| 210 | female | 2  | 2011 | 30 | 19,59 | 24,90 | 0 | 0 | Out |
| 210 | female | 3  | 2011 | 30 | 19,59 | 40,00 | 1 | 0 | Out |
| 210 | female | 4  | 2011 | 30 | 19,59 | 36,70 | 0 | 1 | Out |
| 210 | female | 10 | 2011 | 30 | 19,59 | 39,40 | 2 | 0 | Out |
| 210 | female | 11 | 2011 | 30 | 19,59 | 46,60 | 2 | 0 | Out |
| 210 | female | 1  | 2012 | 31 | 19,59 | 45,30 | 2 | 0 | Out |
| 210 | female | 3  | 2012 | 31 | 19,59 | 39,10 | 2 | 0 | Out |
| 210 | female | 4  | 2012 | 31 | 19,59 | 39,10 | 2 | 0 | Out |
| 211 | female | 1  | 2010 | 26 | 23,84 | 35,98 | 0 | 0 | Out |
| 211 | female | 7  | 2010 | 26 | 23,61 | 32,78 | 0 | 0 | Out |
| 211 | female | 1  | 2011 | 27 | 23,78 | 59,20 | 1 | 0 | Out |
| 211 | female | 12 | 2011 | 27 | 25,23 | 36,50 | 0 | 0 | Out |
| 211 | female | 7  | 2012 | 28 | 25,23 | 44,10 | 0 | 0 | Out |
| 211 | female | 2  | 2015 | 31 | 25,23 | 48,10 | 1 | 0 | Out |
| 212 | male   | 6  | 2011 | 24 | 29,42 | 33,50 | 0 | 0 | Out |
| 212 | male   | 2  | 2012 | 25 | 29,42 | 58,70 | 1 | 0 | Out |
| 212 | male   | 3  | 2012 | 25 | 29,42 | 57,30 | 1 | 1 | Out |
| 212 | male   | 6  | 2012 | 25 | 29,42 | 40,00 | 0 | 1 | Out |
| 212 | male   | 7  | 2012 | 25 | 29,42 | 44,10 | 0 | 1 | Out |
| 212 | male   | 11 | 2012 | 25 | 29,42 | 34,90 | 0 | 0 | Out |
| 212 | male   | 6  | 2013 | 26 | 29,42 | 36,00 | 0 | 0 | Out |
| 212 | male   | 9  | 2013 | 26 | 29,42 | 29,00 | 0 | 0 | Out |
| 212 | male   | 12 | 2013 | 26 | 29,42 | 35,00 | 2 | 0 | Out |
| 212 | male   | 11 | 2014 | 27 | 29,42 | 31,90 | 0 | 0 | Out |
| 213 | female | 1  | 2012 | 23 | 18,26 | 30,60 | 0 | 0 | Out |
| 213 | female | 11 | 2012 | 23 | 18,26 | 31,60 | 0 | 0 | Out |
| 213 | female | 11 | 2014 | 25 | 18,26 | 29,30 | 0 | 0 | Out |
| 214 | male   | 1  | 2013 | 19 | 22,50 | 22,00 | 0 | 0 | Out |
| 215 | male   | 10 | 2013 | 18 | 32,62 | 22,00 | 0 | 0 | Out |
| 216 | female | 4  | 2010 | 21 | 19,20 | 34,55 | 1 | 0 | Out |
| 216 | female | 7  | 2010 | 21 | 18,50 | 26,12 | 0 | 1 | Out |
| 216 | female | 1  | 2011 | 22 | 18,50 | 24,66 | 0 | 0 | Out |
| 216 | female | 2  | 2011 | 22 | 19,16 | 62,50 | 1 | 0 | Out |
| 216 | female | 5  | 2011 | 22 | 19,98 | 51,70 | 0 | 1 | Out |
| 216 | female | 7  | 2011 | 22 | 19,98 | 47,00 | 0 | 1 | Out |
| 216 | female | 11 | 2011 | 22 | 18,87 | 61,30 | 0 | 0 | Out |

|     |        |    |      |    |       |       |   |   |     |
|-----|--------|----|------|----|-------|-------|---|---|-----|
| 216 | female | 4  | 2012 | 23 | 18,87 | 95,70 | 1 | 1 | Out |
| 216 | female | 1  | 2013 | 24 | 18,87 | 54,70 | 1 | 0 | Out |
| 216 | female | 4  | 2013 | 24 | 18,87 | 30,00 | 0 | 1 | Out |
| 216 | female | 1  | 2014 | 25 | 18,87 | 38,00 | 0 | 0 | Out |
| 216 | female | 2  | 2015 | 26 | 18,87 | 46,00 | 2 | 0 | Out |
| 217 | male   | 7  | 2010 | 26 | 23,46 | 34,08 | 0 | 0 | Out |
| 217 | male   | 11 | 2010 | 26 | 23,46 | 24,32 | 0 | 0 | Out |
| 217 | male   | 11 | 2011 | 26 | 22,15 | 34,30 | 0 | 0 | Out |
| 217 | male   | 2  | 2012 | 27 | 22,15 | 62,70 | 1 | 0 | Out |
| 217 | male   | 6  | 2012 | 27 | 22,15 | 51,30 | 0 | 1 | Out |
| 217 | male   | 11 | 2012 | 27 | 22,15 | 36,60 | 0 | 0 | Out |
| 217 | male   | 3  | 2013 | 28 | 22,15 | 56,00 | 1 | 0 | Out |
| 217 | male   | 10 | 2013 | 28 | 22,15 | 29,00 | 0 | 0 | Out |
| 218 | female | 3  | 2012 | 24 | 20,76 | 56,00 | 1 | 0 | Out |
| 219 | male   | 11 | 2009 | 28 | 22,32 | 4,20  | 0 | 0 | Out |
| 219 | male   | 4  | 2010 | 29 | 23,10 | 28,00 | 1 | 0 | Out |
| 220 | male   | 12 | 2014 | 23 | 24,27 | 28,60 | 0 | 0 | Out |
| 221 | male   | 2  | 2011 | 22 | 24,21 | 26,10 | 0 | 0 | Out |
| 222 | female | 10 | 2010 | 38 | 30,02 | 19,51 | 0 | 0 | Out |
| 222 | female | 1  | 2011 | 29 | 30,02 | 16,50 | 0 | 0 | Out |
| 222 | female | 5  | 2011 | 29 | 30,41 | 21,20 | 0 | 0 | Out |
| 222 | female | 10 | 2011 | 29 | 29,86 | 20,50 | 0 | 0 | Out |
| 222 | female | 3  | 2012 | 30 | 29,86 | 23,60 | 0 | 0 | Out |
| 222 | female | 1  | 2013 | 31 | 29,86 | 19,80 | 0 | 0 | Out |
| 222 | female | 5  | 2013 | 31 | 29,86 | 25,00 | 0 | 0 | Out |
| 223 | female | 9  | 2013 | 21 | 32,99 | 38,00 | 2 | 0 | Out |
| 223 | male   | 3  | 2014 | 22 | 32,99 | 26,00 | 0 | 0 | Out |
| 223 | male   | 10 | 2014 | 22 | 32,99 | 28,70 | 0 | 0 | Out |
| 223 | male   | 11 | 2014 | 22 | 32,99 | 29,40 | 0 | 0 | Out |
| 224 | female | 12 | 2014 | 19 | 21,75 | 24,90 | 0 | 0 | Out |
| 224 | female | 2  | 2015 | 20 | 21,75 | 32,90 | 2 | 0 | Out |
| 225 | female | 5  | 2013 | 20 | 35,66 | 14,00 | 0 | 0 | Out |
| 225 | female | 10 | 2013 | 20 | 35,66 | 19,00 | 0 | 0 | Out |
| 225 | female | 1  | 2014 | 21 | 35,66 | 23,00 | 0 | 0 | Out |
| 225 | female | 12 | 2014 | 21 | 35,66 | 18,70 | 0 | 0 | Out |
| 226 | female | 1  | 2010 | 25 | 28,73 | 48,71 | 1 | 0 | Out |
| 226 | female | 11 | 2010 | 25 | 30,64 | 29,81 | 0 | 0 | Out |
| 226 | female | 4  | 2011 | 26 | 29,70 | 43,30 | 1 | 1 | Out |
| 226 | female | 5  | 2011 | 26 | 29,70 | 37,30 | 0 | 1 | Out |
| 226 | female | 11 | 2011 | 26 | 29,70 | 42,20 | 0 | 0 | Out |
| 226 | female | 1  | 2013 | 28 | 29,70 | 35,30 | 1 | 0 | Out |



|     |        |    |      |    |       |       |   |   |     |
|-----|--------|----|------|----|-------|-------|---|---|-----|
| 226 | female | 2  | 2013 | 28 | 29,70 | 47,00 | 1 | 1 | Out |
| 226 | female | 4  | 2013 | 28 | 29,70 | 46,00 | 1 | 1 | Out |
| 226 | female | 11 | 2013 | 28 | 29,70 | 37,00 | 0 | 1 | Out |
| 226 | female | 10 | 2014 | 29 | 29,70 | 45,00 | 0 | 0 | Out |
| 227 | male   | 7  | 2010 | 22 | 21,97 | 24,93 | 0 | 0 | Out |
| 227 | male   | 2  | 2011 | 23 | 21,97 | 21,60 | 0 | 0 | Out |
| 227 | male   | 8  | 2011 | 23 | 21,97 | 28,30 | 0 | 0 | Out |
| 227 | male   | 1  | 2012 | 24 | 21,97 | 33,90 | 1 | 0 | Out |
| 227 | male   | 7  | 2012 | 24 | 21,97 | 47,10 | 0 | 0 | Out |
| 227 | male   | 3  | 2013 | 25 | 21,97 | 27,00 | 0 | 0 | Out |
| 228 | male   | 7  | 2010 | 22 | 21,97 | 24,93 | 0 | 0 | Out |
| 229 | female | 4  | 2013 | 19 | 19,71 | 19,00 | 0 | 0 | Out |
| 229 | female | 6  | 2013 | 19 | 19,71 | 23,00 | 0 | 0 | Out |
| 229 | female | 8  | 2014 | 20 | 19,71 | 33,30 | 0 | 0 | Out |
| 229 | female | 2  | 2015 | 21 | 19,71 | 45,30 | 0 | 0 | Out |
| 230 | male   | 1  | 2010 | 21 | 23,77 | 26,00 | 0 | 0 | Out |
| 230 | male   | 11 | 2010 | 21 | 24,23 | 17,34 | 0 | 0 | Out |
| 230 | male   | 6  | 2011 | 22 | 23,95 | 61,20 | 1 | 1 | Out |
| 230 | male   | 6  | 2012 | 23 | 23,95 | 60,10 | 1 | 1 | Out |
| 230 | male   | 7  | 2012 | 23 | 23,95 | 60,60 | 0 | 0 | Out |
| 230 | male   | 10 | 2014 | 25 | 23,95 | 29,60 | 0 | 0 | Out |
| 231 | female | 7  | 2010 | 28 | 31,46 | 21,21 | 0 | 0 | Out |
| 232 | male   | 12 | 2014 | 21 | 23,71 | 40,00 | 0 | 0 | Out |
| 233 | male   | 4  | 2012 | 23 | 20,45 | 56,60 | 1 | 0 | Out |
| 233 | male   | 11 | 2012 | 23 | 20,45 | 43,40 | 1 | 0 | Out |
| 234 | male   | 8  | 2010 | 23 | 31,86 | 36,91 | 0 | 1 | Out |
| 234 | male   | 3  | 2011 | 24 | 31,86 | 24,30 | 0 | 0 | Out |
| 234 | male   | 2  | 2012 | 25 | 31,86 | 39,40 | 1 | 0 | Out |
| 235 | female | 6  | 2010 | 24 | 19,21 | 31,53 | 0 | 0 | Out |
| 235 | female | 8  | 2010 | 24 | 19,21 | 36,91 | 0 | 0 | Out |
| 235 | female | 1  | 2011 | 25 | 19,38 | 28,10 | 0 | 0 | Out |
| 235 | female | 2  | 2011 | 25 | 19,72 | 99,40 | 1 | 0 | Out |
| 235 | female | 4  | 2011 | 25 | 19,72 | 43,20 | 0 | 1 | Out |
| 235 | female | 5  | 2011 | 25 | 19,72 | 38,70 | 0 | 1 | Out |
| 235 | female | 7  | 2011 | 25 | 19,72 | 52,50 | 0 | 0 | Out |
| 236 | male   | 11 | 2010 | 19 | 24,25 | 26,17 | 0 | 0 | Out |
| 236 | male   | 2  | 2011 | 20 | 24,54 | 35,70 | 2 | 0 | Out |
| 236 | male   | 7  | 2011 | 20 | 25,11 | 58,40 | 0 | 1 | Out |
| 236 | male   | 11 | 2012 | 21 | 25,11 | 36,80 | 2 | 0 | Out |
| 236 | male   | 1  | 2013 | 22 | 25,11 | 29,30 | 2 | 0 | Out |
| 236 | male   | 7  | 2013 | 23 | 25,11 | 41,00 | 0 | 1 | Out |

|     |        |    |      |    |       |       |   |   |     |
|-----|--------|----|------|----|-------|-------|---|---|-----|
| 236 | male   | 10 | 2014 | 24 | 25,11 | 32,60 | 0 | 0 | Out |
| 237 | female | 1  | 2010 | 30 | 20,82 | 32,98 | 0 | 0 | Out |
| 237 | female | 8  | 2010 | 30 | 21,49 | 33,98 | 0 | 0 | Out |
| 238 | male   | 2  | 2010 | 34 | 37,95 | 23,04 | 0 | 0 | Out |
| 238 | male   | 7  | 2010 | 34 | 37,18 | 18,95 | 0 | 0 | Out |
| 238 | male   | 11 | 2010 | 34 | 33,60 | 18,42 | 0 | 0 | Out |
| 238 | male   | 1  | 2011 | 35 | 33,46 | 25,60 | 0 | 0 | Out |
| 238 | male   | 1  | 2012 | 36 | 33,46 | 16,20 | 0 | 0 | Out |
| 239 | male   | 6  | 2012 | 22 | 19,63 | 46,70 | 0 | 1 | Out |
| 239 | male   | 12 | 2013 | 23 | 19,63 | 31,00 | 0 | 0 | Out |
| 239 | male   | 5  | 2014 | 24 | 19,63 | 47,20 | 1 | 0 | Out |
| 240 | m      | 12 | 2011 | 16 | 12,50 | 24,45 | 0 | 0 | In  |
| 241 | m      | 7  | 2014 | 32 | 38,90 | 29,45 | 1 | 0 | In  |
| 241 | m      | 2  | 2015 | 33 | 20,90 | 29,45 | 0 | 0 | In  |
| 242 | k      | 12 | 2011 | 15 | 24,60 | 22,94 | 0 | 0 | In  |
| 243 | k      | 5  | 2009 | 24 | 21,90 | 39,67 | 0 | 0 | In  |
| 243 | k      | 10 | 2009 | 24 | 23,10 | 39,67 | 0 | 0 | In  |
| 243 | k      | 5  | 2010 | 25 | 25,12 | 39,67 | 0 | 0 | In  |
| 243 | k      | 7  | 2010 | 25 | 25,63 | 39,67 | 0 | 0 | In  |
| 243 | k      | 5  | 2011 | 26 | 30,80 | 39,67 | 0 | 0 | In  |
| 243 | k      | 9  | 2011 | 26 | 33,20 | 39,67 | 0 | 0 | In  |
| 243 | k      | 12 | 2011 | 26 | 29,90 | 39,67 | 0 | 0 | In  |
| 243 | k      | 5  | 2012 | 27 | 40,10 | 39,67 | 0 | 0 | In  |
| 243 | k      | 12 | 2012 | 27 | 25,20 | 39,67 | 0 | 0 | In  |
| 244 | k      | 5  | 2009 | 18 | 32,16 | 23,11 | 0 | 0 | In  |
| 244 | k      | 10 | 2009 | 18 | 33,66 | 23,11 | 0 | 0 | In  |
| 245 | m      | 4  | 2012 | 25 | 16,30 | 24,49 | 0 | 0 | In  |
| 245 | m      | 4  | 2013 | 26 | 18,00 | 24,49 | 0 | 0 | In  |
| 246 | k      | 4  | 2012 | 26 | 36,60 | 21,86 | 0 | 0 | In  |
| 247 | k      | 4  | 2012 | 32 | 24,60 | 20,23 | 0 | 0 | In  |
| 247 | k      | 4  | 2014 | 34 | 21,90 | 20,23 | 0 | 0 | In  |
| 248 | m      | 10 | 2009 | 27 | 22,94 | 25,98 | 0 | 0 | In  |
| 248 | m      | 1  | 2010 | 28 | 19,63 | 25,98 | 0 | 0 | In  |
| 248 | m      | 1  | 2012 | 30 | 14,40 | 25,98 | 0 | 0 | In  |
| 248 | m      | 7  | 2014 | 32 | 27,70 | 25,98 | 1 | 0 | In  |
| 248 | m      | 2  | 2015 | 33 | 26,00 | 25,98 | 0 | 0 | In  |
| 249 | m      | 4  | 2013 | 22 | 22,00 | 24,74 | 0 | 0 | In  |
| 249 | m      | 5  | 2014 | 23 | 16,10 | 24,74 | 0 | 0 | In  |
| 250 | m      | 9  | 2011 | 27 | 19,60 | 31,13 | 0 | 0 | In  |
| 251 | m      | 7  | 2014 | 32 | 32,70 | 28,06 | 1 | 0 | In  |
| 251 | m      | 2  | 2015 | 33 | 15,50 | 28,06 | 0 | 0 | In  |

|     |   |    |      |    |       |       |   |   |    |
|-----|---|----|------|----|-------|-------|---|---|----|
| 252 | m | 5  | 2014 | 27 | 21,00 | 23,43 | 0 | 0 | In |
| 253 | k | 12 | 2011 | 19 | 34,40 | 21,45 | 0 | 0 | In |
| 254 | m | 6  | 2011 | 23 | 36,20 | 24,51 | 0 | 0 | In |
| 254 | m | 7  | 2014 | 26 | 41,80 | 24,51 | 1 | 0 | In |
| 254 | m | 2  | 2015 | 27 | 28,20 | 24,51 | 0 | 0 | In |
| 255 | m | 9  | 2011 | 24 | 17,00 | 33,41 | 0 | 0 | In |
| 256 | m | 7  | 2014 | 28 | 24,90 | 24,30 | 1 | 0 | In |
| 256 | m | 2  | 2015 | 29 | 12,20 | 24,30 | 0 | 0 | In |
| 257 | m | 9  | 2011 | 29 | 33,50 | 33,38 | 0 | 0 | In |
| 258 | m | 4  | 2012 | 22 | 13,80 | 24,98 | 0 | 0 | In |
| 258 | m | 4  | 2013 | 23 | 13,00 | 24,98 | 0 | 0 | In |
| 258 | m | 5  | 2014 | 24 | 26,90 | 24,98 | 0 | 0 | In |
| 259 | k | 4  | 2014 | 25 | 20,40 | 22,76 | 0 | 0 | In |
| 260 | k | 5  | 2010 | 21 | 26,94 | 21,08 | 0 | 0 | In |
| 261 | k | 5  | 2011 | 18 | 39,30 | 20,17 | 0 | 0 | In |
| 261 | k | 12 | 2011 | 18 | 20,80 | 20,17 | 0 | 0 | In |
| 261 | k | 5  | 2012 | 19 | 29,60 | 20,17 | 0 | 0 | In |
| 261 | k | 12 | 2012 | 19 | 26,80 | 20,17 | 0 | 0 | In |
| 262 | m | 4  | 2012 | 21 | 14,30 | 25,50 | 0 | 0 | In |
| 262 | m | 4  | 2013 | 22 | 15,00 | 25,50 | 0 | 0 | In |
| 262 | m | 5  | 2014 | 23 | 16,30 | 25,50 | 0 | 0 | In |
| 263 | k | 12 | 2012 | 23 | 22,60 | 19,88 | 0 | 0 | In |
| 264 | k | 5  | 2010 | 22 | 45,99 | 19,23 | 0 | 0 | In |
| 265 | m | 1  | 2010 | 28 | 20,02 | 29,59 | 0 | 0 | In |
| 266 | k | 5  | 2009 | 29 | 20,34 | 25,08 | 0 | 0 | In |
| 266 | k | 5  | 2011 | 31 | 27,50 | 25,08 | 0 | 0 | In |
| 267 | m | 12 | 2011 | 18 | 21,70 | 36,16 | 0 | 0 | In |
| 268 | m | 6  | 2011 | 29 | 24,10 | 25,00 | 0 | 0 | In |
| 268 | m | 7  | 2014 | 32 | 28,70 | 25,00 | 1 | 0 | In |
| 268 | m | 2  | 2015 | 33 | 27,20 | 25,00 | 0 | 0 | In |
| 269 | k | 12 | 2011 | 14 | 10,00 | 24,17 | 0 | 0 | In |
| 270 | k | 5  | 2011 | 22 | 31,20 | 21,36 | 0 | 0 | In |
| 271 | k | 5  | 2010 | 22 | 24,66 | 24,34 | 0 | 0 | In |
| 272 | m | 4  | 2013 | 22 | 17,00 | 21,00 | 0 | 0 | In |
| 273 | m | 4  | 2012 | 34 | 15,60 | 25,74 | 0 | 0 | In |
| 273 | m | 4  | 2013 | 35 | 14,00 | 25,74 | 0 | 0 | In |
| 273 | m | 5  | 2014 | 36 | 22,20 | 21,00 | 0 | 0 | In |
| 274 | m | 10 | 2009 | 25 | 16,49 | 25,23 | 0 | 0 | In |
| 274 | m | 1  | 2010 | 26 | 24,70 | 25,23 | 0 | 0 | In |
| 274 | m | 7  | 2014 | 30 | 25,70 | 25,23 | 1 | 0 | In |
| 274 | m | 2  | 2015 | 31 | 14,20 | 25,23 | 0 | 0 | In |

|     |   |    |      |    |       |       |   |   |    |
|-----|---|----|------|----|-------|-------|---|---|----|
| 275 | m | 4  | 2012 | 25 | 26,60 | 23,96 | 0 | 0 | In |
| 275 | m | 4  | 2013 | 26 | 26,00 | 23,96 | 0 | 0 | In |
| 276 | k | 12 | 2011 | 19 | 20,40 | 22,81 | 0 | 0 | In |
| 277 | m | 10 | 2009 | 26 | 16,12 | 26,58 | 0 | 0 | In |
| 277 | m | 1  | 2010 | 27 | 14,87 | 26,58 | 0 | 0 | In |
| 277 | m | 6  | 2011 | 28 | 28,70 | 26,58 | 0 | 0 | In |
| 277 | m | 1  | 2012 | 29 | 16,00 | 26,58 | 0 | 0 | In |
| 278 | m | 10 | 2009 | 30 | 19,98 | 30,70 | 0 | 0 | In |
| 278 | m | 1  | 2010 | 31 | 15,16 | 30,70 | 0 | 0 | In |
| 278 | m | 6  | 2011 | 32 | 34,60 | 30,70 | 0 | 0 | In |
| 278 | m | 1  | 2012 | 33 | 24,00 | 30,70 | 0 | 0 | In |
| 279 | m | 10 | 2009 | 25 | 21,08 | 28,57 | 0 | 0 | In |
| 279 | m | 6  | 2011 | 27 | 20,50 | 28,57 | 0 | 0 | In |
| 279 | m | 1  | 2012 | 28 | 23,60 | 28,57 | 0 | 0 | In |
| 279 | m | 7  | 2014 | 30 | 33,70 | 28,57 | 1 | 0 | In |
| 279 | m | 2  | 2015 | 31 | 22,00 | 28,57 | 0 | 0 | In |
| 280 | m | 1  | 2010 | 28 | 11,68 | 26,26 | 0 | 0 | In |
| 280 | m | 6  | 2011 | 29 | 30,20 | 26,26 | 0 | 0 | In |
| 280 | m | 1  | 2012 | 30 | 20,80 | 26,26 | 0 | 0 | In |
| 281 | k | 12 | 2011 | 14 | 11,60 | 25,51 | 0 | 0 | In |
| 282 | k | 5  | 2010 | 26 | 33,01 | 18,72 | 0 | 0 | In |
| 282 | k | 4  | 2012 | 28 | 52,20 | 18,72 | 0 | 0 | In |
| 283 | k | 5  | 2010 | 22 | 21,18 | 20,01 | 0 | 0 | In |
| 283 | k | 4  | 2014 | 26 | 31,40 | 20,01 | 0 | 0 | In |
| 284 | k | 4  | 2014 | 24 | 24,20 | 22,59 | 0 | 0 | In |
| 285 | k | 5  | 2009 | 21 | 28,92 | 22,67 | 0 | 0 | In |
| 285 | k | 10 | 2009 | 21 | 27,00 | 22,67 | 0 | 0 | In |
| 285 | k | 5  | 2010 | 22 | 28,65 | 22,67 | 0 | 0 | In |
| 285 | k | 7  | 2010 | 22 | 28,80 | 22,67 | 0 | 0 | In |
| 285 | k | 5  | 2011 | 23 | 21,20 | 22,67 | 0 | 0 | In |
| 285 | k | 9  | 2011 | 23 | 25,30 | 22,67 | 0 | 0 | In |
| 285 | k | 5  | 2012 | 24 | 41,30 | 22,67 | 0 | 0 | In |
| 286 | m | 9  | 2011 | 24 | 26,50 | 33,31 | 0 | 0 | In |
| 287 | k | 5  | 2010 | 23 | 29,44 | 23,20 | 0 | 0 | In |
| 287 | k | 4  | 2012 | 25 | 39,50 | 21,50 | 0 | 0 | In |
| 288 | k | 12 | 2011 | 20 | 56,20 | 21,30 | 0 | 0 | In |
| 289 | k | 9  | 2011 | 29 | 28,40 | 24,56 | 0 | 0 | In |
| 289 | k | 5  | 2012 | 30 | 25,60 | 24,56 | 0 | 0 | In |
| 290 | m | 4  | 2012 | 23 | 16,80 | 20,79 | 0 | 0 | In |
| 290 | m | 4  | 2013 | 24 | 18,00 | 20,79 | 0 | 0 | In |
| 290 | m | 5  | 2014 | 25 | 20,10 | 20,79 | 0 | 0 | In |

|     |   |    |      |    |       |       |   |   |    |
|-----|---|----|------|----|-------|-------|---|---|----|
| 291 | m | 9  | 2011 | 24 | 20,00 | 30,86 | 0 | 0 | In |
| 292 | k | 12 | 2011 | 17 | 18,80 | 23,05 | 0 | 0 | In |
| 293 | m | 4  | 2012 | 23 | 10,10 | 25,00 | 0 | 0 | In |
| 293 | m | 4  | 2013 | 24 | 13,00 | 25,00 | 0 | 0 | In |
| 293 | m | 5  | 2014 | 25 | 18,90 | 25,00 | 0 | 0 | In |
| 294 | k | 5  | 2010 | 25 | 18,03 | 23,08 | 0 | 0 | In |
| 295 | m | 12 | 2011 | 18 | 19,00 | 26,08 | 0 | 0 | In |
| 296 | k | 4  | 2014 | 19 | 10,90 | 21,30 | 0 | 0 | In |
| 297 | k | 5  | 2010 | 25 | 27,33 | 21,50 | 0 | 0 | In |
| 298 | m | 4  | 2012 | 23 | 16,40 | 22,84 | 0 | 0 | In |
| 298 | m | 4  | 2013 | 24 | 15,00 | 22,84 | 0 | 0 | In |
| 299 | m | 10 | 2009 | 25 | 31,35 | 27,16 | 0 | 0 | In |
| 300 | k | 12 | 2011 | 19 | 23,20 | 23,53 | 0 | 0 | In |
| 301 | m | 4  | 2012 | 22 | 16,90 | 22,62 | 0 | 0 | In |
| 301 | m | 4  | 2013 | 23 | 17,00 | 22,62 | 0 | 0 | In |
| 302 | m | 4  | 2012 | 24 | 26,40 | 24,94 | 0 | 0 | In |
| 302 | m | 4  | 2013 | 25 | 21,00 | 24,94 | 0 | 0 | In |
| 302 | m | 5  | 2014 | 26 | 26,00 | 24,94 | 0 | 0 | In |
| 303 | m | 10 | 2009 | 26 | 25,82 | 28,67 | 0 | 0 | In |
| 303 | m | 1  | 2010 | 27 | 29,17 | 28,67 | 0 | 0 | In |
| 303 | m | 6  | 2011 | 28 | 29,70 | 28,67 | 0 | 0 | In |
| 303 | m | 1  | 2012 | 29 | 25,80 | 28,67 | 0 | 0 | In |
| 304 | k | 12 | 2011 | 18 | 19,30 | 23,44 | 0 | 0 | In |
| 305 | m | 4  | 2012 | 24 | 34,50 | 24,27 | 0 | 0 | In |
| 305 | m | 4  | 2013 | 25 | 17,00 | 24,27 | 0 | 0 | In |
| 305 | m | 5  | 2014 | 26 | 13,10 | 24,27 | 0 | 0 | In |
| 306 | k | 4  | 2014 | 22 | 14,90 | 21,56 | 0 | 0 | In |
| 307 | m | 1  | 2012 | 27 | 31,10 | 28,22 | 0 | 0 | In |
| 308 | k | 5  | 2010 | 25 | 30,03 | 22,95 | 0 | 0 | In |
| 308 | k | 9  | 2011 | 26 | 27,90 | 22,95 | 0 | 0 | In |
| 308 | k | 12 | 2011 | 26 | 33,00 | 22,95 | 0 | 0 | In |
| 308 | k | 5  | 2012 | 27 | 39,60 | 22,95 | 0 | 0 | In |
| 309 | m | 10 | 2009 | 26 | 17,09 | 24,75 | 0 | 0 | In |
| 309 | m | 1  | 2010 | 27 | 4,00  | 24,75 | 0 | 0 | In |
| 309 | m | 1  | 2012 | 29 | 14,20 | 24,75 | 0 | 0 | In |
| 309 | m | 7  | 2014 | 31 | 34,30 | 24,75 | 1 | 0 | In |
| 309 | m | 2  | 2015 | 32 | 20,80 | 24,75 | 0 | 0 | In |
| 310 | m | 10 | 2009 | 32 | 21,04 | 24,48 | 0 | 0 | In |
| 310 | m | 1  | 2010 | 33 | 19,22 | 24,48 | 0 | 0 | In |
| 311 | k | 9  | 2011 | 22 | 25,60 | 24,92 | 0 | 0 | In |
| 312 | k | 5  | 2010 | 21 | 21,36 | 26,99 | 0 | 0 | In |

|     |   |    |      |    |       |       |   |   |    |
|-----|---|----|------|----|-------|-------|---|---|----|
| 312 | k | 7  | 2010 | 22 | 24,34 | 26,99 | 0 | 0 | In |
| 312 | k | 5  | 2011 | 23 | 25,70 | 26,99 | 0 | 0 | In |
| 312 | k | 9  | 2011 | 22 | 23,60 | 26,99 | 0 | 0 | In |
| 312 | k | 12 | 2011 | 22 | 26,20 | 26,99 | 0 | 0 | In |
| 312 | k | 5  | 2012 | 23 | 30,00 | 26,99 | 0 | 0 | In |
| 312 | k | 12 | 2012 | 23 | 26,50 | 26,99 | 0 | 0 | In |
| 313 | k | 5  | 2009 | 21 | 30,78 | 23,23 | 0 | 0 | In |
| 313 | k | 10 | 2009 | 21 | 34,58 | 23,23 | 0 | 0 | In |
| 313 | k | 5  | 2010 | 22 | 26,34 | 23,23 | 0 | 0 | In |
| 313 | k | 5  | 2011 | 23 | 20,10 | 23,23 | 0 | 0 | In |
| 314 | m | 4  | 2012 | 25 | 28,20 | 23,16 | 0 | 0 | In |
| 314 | m | 4  | 2013 | 26 | 19,00 | 23,16 | 0 | 0 | In |
| 315 | k | 5  | 2010 | 23 | 27,42 | 20,94 | 0 | 0 | In |
| 315 | k | 4  | 2012 | 25 | 47,20 | 20,94 | 0 | 0 | In |
| 316 | m | 10 | 2009 | 23 | 12,64 | 29,08 | 0 | 0 | In |
| 316 | m | 1  | 2010 | 24 | 4,00  | 29,08 | 0 | 0 | In |
| 316 | m | 6  | 2011 | 25 | 19,30 | 29,08 | 0 | 0 | In |
| 317 | k | 5  | 2009 | 18 | 25,84 | 26,23 | 0 | 0 | In |
| 317 | k | 10 | 2009 | 18 | 18,21 | 26,62 | 0 | 0 | In |
| 317 | k | 9  | 2011 | 20 | 30,10 | 25,46 | 0 | 0 | In |
| 318 | k | 4  | 2012 | 22 | 35,80 | 21,45 | 0 | 0 | In |
| 319 | k | 12 | 2011 | 13 | 14,00 | 24,09 | 0 | 0 | In |
| 320 | k | 5  | 2011 | 19 | 30,90 | 24,09 | 0 | 0 | In |
| 321 | k | 12 | 2011 | 19 | 9,00  | 41,47 | 0 | 0 | In |
| 322 | m | 4  | 2012 | 21 | 10,90 | 19,84 | 0 | 0 | In |
| 322 | m | 5  | 2014 | 23 | 14,60 | 19,84 | 0 | 0 | In |
| 323 | k | 5  | 2010 | 31 | 26,00 | 22,86 | 0 | 0 | In |
| 323 | k | 9  | 2011 | 32 | 28,80 | 22,86 | 0 | 0 | In |
| 324 | k | 12 | 2011 | 14 | 13,20 | 20,28 | 0 | 0 | In |
| 325 | m | 10 | 2009 | 29 | 32,48 | 25,73 | 0 | 0 | In |
| 325 | m | 1  | 2010 | 30 | 23,19 | 25,73 | 0 | 0 | In |
| 326 | k | 10 | 2009 | 22 | 24,12 | 30,08 | 0 | 0 | In |
| 326 | k | 5  | 2010 | 23 | 27,00 | 30,08 | 0 | 0 | In |
| 326 | k | 7  | 2010 | 23 | 27,09 | 30,08 | 0 | 0 | In |
| 326 | k | 5  | 2011 | 24 | 33,50 | 30,08 | 0 | 0 | In |
| 326 | k | 9  | 2011 | 24 | 33,80 | 30,08 | 0 | 0 | In |
| 326 | k | 12 | 2011 | 24 | 44,40 | 30,08 | 0 | 0 | In |
| 326 | k | 5  | 2012 | 25 | 43,10 | 30,08 | 0 | 0 | In |
| 326 | k | 12 | 2012 | 25 | 28,40 | 30,08 | 0 | 0 | In |
| 327 | m | 4  | 2012 | 27 | 24,10 | 23,36 | 0 | 0 | In |
| 327 | m | 4  | 2013 | 28 | 26,00 | 23,36 | 0 | 0 | In |

|     |   |    |      |    |       |       |   |   |    |
|-----|---|----|------|----|-------|-------|---|---|----|
| 327 | m | 5  | 2014 | 29 | 17,80 | 23,36 | 0 | 0 | In |
| 328 | m | 7  | 2014 | 28 | 32,70 | 28,79 | 1 | 0 | In |
| 328 | m | 2  | 2015 | 29 | 16,00 | 28,79 | 0 | 0 | In |
| 329 | m | 12 | 2011 | 17 | 13,90 | 19,72 | 0 | 0 | In |
| 330 | m | 4  | 2012 | 25 | 11,20 | 24,74 | 0 | 0 | In |
| 330 | m | 4  | 2013 | 26 | 15,00 | 24,74 | 0 | 0 | In |
| 330 | m | 5  | 2014 | 27 | 22,36 | 24,74 | 0 | 0 | In |
| 331 | k | 5  | 2010 | 22 | 24,79 | 21,22 | 0 | 0 | In |
| 331 | k | 4  | 2012 | 24 | 48,00 | 21,22 | 0 | 0 | In |
| 332 | m | 6  | 2011 | 22 | 28,60 | 26,32 | 0 | 0 | In |
| 333 | m | 12 | 2011 | 17 | 27,20 | 21,19 | 0 | 0 | In |
| 334 | m | 12 | 2011 | 17 | 29,50 | 26,15 | 0 | 0 | In |
| 335 | k | 5  | 2009 | 17 | 22,48 | 27,43 | 0 | 0 | In |
| 335 | k | 10 | 2009 | 17 | 23,82 | 27,43 | 0 | 0 | In |
| 336 | m | 10 | 2009 | 27 | 22,04 | 24,92 | 0 | 0 | In |
| 337 | k | 4  | 2012 | 27 | 53,90 | 20,56 | 0 | 0 | In |
| 338 | k | 5  | 2010 | 19 | 21,24 | 18,51 | 0 | 0 | In |
| 339 | k | 4  | 2014 | 25 | 16,70 | 21,33 | 0 | 0 | In |
| 340 | k | 5  | 2009 | 18 | 24,03 | 25,43 | 0 | 0 | In |
| 340 | k | 10 | 2009 | 18 | 25,37 | 25,43 | 0 | 0 | In |
| 340 | k | 5  | 2011 | 20 | 23,40 | 25,43 | 0 | 0 | In |
| 341 | m | 12 | 2011 | 18 | 27,90 | 26,64 | 0 | 0 | In |
| 342 | m | 7  | 2014 | 26 | 37,00 | 24,62 | 1 | 0 | In |
| 342 | m | 2  | 2015 | 27 | 14,00 | 24,62 | 0 | 0 | In |
| 343 | k | 5  | 2011 | 15 | 29,20 | 23,44 | 0 | 0 | In |
| 343 | k | 9  | 2011 | 15 | 24,60 | 23,44 | 2 | 0 | In |
| 343 | k | 12 | 2011 | 15 | 22,50 | 23,44 | 0 | 0 | In |
| 343 | k | 5  | 2012 | 16 | 28,10 | 23,44 | 0 | 0 | In |
| 343 | k | 12 | 2012 | 16 | 22,90 | 23,44 | 0 | 0 | In |
| 344 | m | 10 | 2009 | 25 | 44,07 | 26,04 | 0 | 0 | In |
| 344 | m | 1  | 2010 | 26 | 48,00 | 26,04 | 0 | 0 | In |
| 344 | m | 1  | 2012 | 28 | 46,60 | 26,04 | 0 | 0 | In |
| 344 | m | 7  | 2014 | 30 | 36,50 | 26,04 | 1 | 0 | In |
| 344 | m | 2  | 2015 | 31 | 7,45  | 26,04 | 0 | 0 | In |
| 345 | m | 4  | 2012 | 29 | 15,90 | 22,20 | 0 | 0 | In |
| 345 | m | 4  | 2013 | 30 | 18,00 | 22,20 | 0 | 0 | In |
| 345 | m | 5  | 2014 | 31 | 13,90 | 22,20 | 0 | 0 | In |
| 346 | k | 12 | 2011 | 16 | 20,70 | 21,08 | 0 | 0 | In |
| 347 | k | 5  | 2010 | 26 | 30,03 | 20,52 | 0 | 0 | In |
| 348 | m | 7  | 2014 | 29 | 36,40 | 26,30 | 1 | 0 | In |
| 348 | m | 2  | 2015 | 30 | 11,40 | 26,30 | 0 | 0 | In |

|     |   |    |      |    |       |       |   |   |    |
|-----|---|----|------|----|-------|-------|---|---|----|
| 349 | k | 5  | 2010 | 25 | 28,93 | 21,50 | 0 | 0 | In |
| 349 | k | 4  | 2012 | 24 | 35,90 | 21,50 | 0 | 0 | In |
| 350 | m | 10 | 2009 | 34 | 28,91 | 29,33 | 0 | 0 | In |
| 350 | m | 1  | 2010 | 35 | 30,71 | 29,33 | 0 | 0 | In |
| 351 | m | 12 | 2011 | 17 | 17,70 | 28,40 | 0 | 0 | In |
| 352 | k | 4  | 2012 | 24 | 21,10 | 20,60 | 0 | 0 | In |
| 353 | k | 4  | 2012 | 29 | 19,60 | 21,20 | 0 | 0 | In |
| 353 | k | 4  | 2014 | 31 | 15,80 | 21,20 | 0 | 0 | In |
| 354 | k | 4  | 2012 | 29 | 15,80 | 20,44 | 0 | 0 | In |
| 355 | m | 12 | 2011 | 17 | 10,90 | 28,01 | 0 | 0 | In |
| 356 | k | 5  | 2009 | 24 | 41,69 | 22,95 | 0 | 0 | In |
| 356 | k | 10 | 2009 | 24 | 25,94 | 22,95 | 0 | 0 | In |
| 357 | k | 12 | 2011 | 22 | 33,50 | 21,30 | 0 | 0 | In |
| 358 | m | 12 | 2011 | 17 | 35,90 | 26,37 | 0 | 0 | In |
| 359 | k | 5  | 2010 | 23 | 27,47 | 20,20 | 0 | 0 | In |
| 360 | m | 1  | 2012 | 21 | 51,10 | 26,81 | 0 | 0 | In |
| 361 | k | 12 | 2011 | 16 | 9,10  | 20,00 | 0 | 0 | In |
| 362 | m | 10 | 2009 | 31 | 21,00 | 27,45 | 0 | 0 | In |
| 362 | m | 1  | 2010 | 32 | 15,89 | 27,45 | 0 | 0 | In |
| 362 | m | 6  | 2011 | 33 | 24,80 | 27,45 | 0 | 0 | In |
| 362 | m | 7  | 2014 | 36 | 30,60 | 27,45 | 1 | 0 | In |
| 362 | m | 2  | 2015 | 37 | 23,10 | 27,45 | 0 | 0 | In |
| 363 | m | 9  | 2011 | 27 | 21,80 | 29,03 | 0 | 0 | In |
| 364 | k | 4  | 2014 | 20 | 7,14  | 19,45 | 0 | 0 | In |
| 365 | m | 12 | 2011 | 16 | 18,20 | 24,80 | 0 | 0 | In |
| 366 | k | 12 | 2011 | 23 | 17,80 | 24,02 | 0 | 0 | In |
| 367 | m | 12 | 2011 | 17 | 18,50 | 28,28 | 0 | 0 | In |
| 368 | m | 7  | 2014 | 26 | 39,80 | 23,89 | 1 | 0 | In |
| 369 | m | 1  | 2012 | 32 | 27,90 | 25,25 | 0 | 0 | In |
| 369 | m | 7  | 2014 | 34 | 29,80 | 25,25 | 1 | 0 | In |
| 369 | m | 2  | 2015 | 35 | 12,10 | 25,25 | 0 | 0 | In |
| 370 | m | 10 | 2009 | 30 | 22,18 | 27,46 | 0 | 0 | In |
| 370 | m | 1  | 2010 | 31 | 15,84 | 27,46 | 0 | 0 | In |
| 370 | m | 6  | 2011 | 32 | 17,80 | 27,46 | 0 | 0 | In |
| 370 | m | 1  | 2012 | 33 | 15,60 | 27,46 | 0 | 0 | In |
| 371 | k | 4  | 2012 | 21 | 37,10 | 19,33 | 0 | 0 | In |
| 371 | k | 4  | 2014 | 23 | 25,90 | 19,33 | 0 | 0 | In |
| 372 | m | 6  | 2011 | 26 | 24,20 | 25,76 | 0 | 0 | In |
| 372 | m | 1  | 2012 | 27 | 24,70 | 25,76 | 0 | 0 | In |
| 373 | k | 4  | 2014 | 19 | 19,30 | 22,35 | 0 | 0 | In |
| 374 | k | 10 | 2009 | 20 | 19,68 | 25,91 | 0 | 0 | In |



|     |   |    |      |    |       |       |   |   |    |
|-----|---|----|------|----|-------|-------|---|---|----|
| 374 | k | 5  | 2010 | 21 | 21,77 | 25,91 | 0 | 0 | In |
| 374 | k | 5  | 2011 | 22 | 39,00 | 25,91 | 0 | 0 | In |
| 374 | k | 9  | 2011 | 22 | 18,80 | 25,91 | 0 | 0 | In |
| 374 | k | 12 | 2011 | 22 | 20,00 | 25,91 | 0 | 0 | In |
| 374 | k | 5  | 2012 | 23 | 29,70 | 25,91 | 0 | 0 | In |
| 375 | k | 4  | 2012 | 28 | 54,90 | 21,78 | 0 | 0 | In |
| 376 | m | 1  | 2012 | 32 | 14,10 | 26,85 | 0 | 0 | In |
| 377 | m | 4  | 2013 | 25 | 27,00 | 24,48 | 0 | 0 | In |
| 378 | m | 4  | 2012 | 29 | 25,30 | 23,50 | 0 | 0 | In |
| 378 | m | 4  | 2013 | 30 | 33,00 | 23,50 | 0 | 0 | In |
| 378 | m | 5  | 2014 | 31 | 16,00 | 24,48 | 0 | 0 | In |
| 379 | m | 1  | 2012 | 32 | 20,90 | 23,55 | 0 | 0 | In |
| 380 | m | 4  | 2012 | 23 | 16,00 | 26,28 | 0 | 0 | In |
| 380 | m | 4  | 2013 | 24 | 13,00 | 26,28 | 0 | 0 | In |
| 380 | m | 5  | 2014 | 25 | 15,30 | 23,50 | 0 | 0 | In |
| 381 | m | 5  | 2014 | 31 | 21,50 | 26,80 | 0 | 0 | In |
| 382 | m | 5  | 2014 | 31 | 18,60 | 21,26 | 0 | 0 | In |
| 383 | m | 10 | 2009 | 33 | 18,82 | 25,66 | 0 | 0 | In |
| 384 | m | 4  | 2013 | 23 | 18,00 | 22,75 | 0 | 0 | In |
| 385 | m | 4  | 2012 | 29 | 21,20 | 22,69 | 0 | 0 | In |
| 385 | m | 4  | 2013 | 30 | 20,00 | 22,69 | 0 | 0 | In |
| 385 | m | 5  | 2014 | 31 | 18,50 | 22,69 | 0 | 0 | In |
| 386 | k | 5  | 2010 | 25 | 29,70 | 22,48 | 0 | 0 | In |
| 387 | m | 4  | 2012 | 24 | 21,30 | 23,46 | 0 | 0 | In |
| 387 | m | 4  | 2013 | 25 | 17,00 | 23,46 | 0 | 0 | In |
| 387 | m | 5  | 2014 | 26 | 16,60 | 23,46 | 0 | 0 | In |
| 388 | k | 5  | 2010 | 22 | 30,40 | 20,00 | 0 | 0 | In |
| 389 | k | 5  | 2010 | 20 | 28,87 | 22,89 | 0 | 0 | In |
| 389 | k | 4  | 2012 | 22 | 50,30 | 22,89 | 0 | 0 | In |
| 389 | k | 4  | 2014 | 24 | 37,30 | 22,89 | 0 | 0 | In |
| 390 | k | 4  | 2014 | 20 | 7,73  | 21,62 | 0 | 0 | In |
| 391 | m | 4  | 2012 | 24 | 8,90  | 22,61 | 0 | 0 | In |
| 391 | m | 4  | 2013 | 25 | 14,00 | 22,61 | 0 | 0 | In |
| 391 | m | 5  | 2014 | 26 | 12,10 | 22,61 | 0 | 0 | In |
| 392 | k | 5  | 2009 | 28 | 19,33 | 36,75 | 0 | 0 | In |
| 392 | k | 5  | 2010 | 29 | 15,24 | 36,75 | 0 | 0 | In |
| 393 | k | 12 | 2011 | 18 | 16,20 | 22,66 | 0 | 0 | In |
| 394 | k | 12 | 2011 | 15 | 48,10 | 22,06 | 0 | 0 | In |
| 395 | m | 10 | 2009 | 21 | 28,54 | 25,25 | 0 | 0 | In |
| 395 | m | 1  | 2010 | 22 | 27,18 | 25,25 | 0 | 0 | In |
| 395 | m | 6  | 2011 | 23 | 29,00 | 25,25 | 0 | 0 | In |

|     |   |    |      |    |       |       |   |   |    |
|-----|---|----|------|----|-------|-------|---|---|----|
| 395 | m | 1  | 2012 | 24 | 21,50 | 25,25 | 0 | 0 | In |
| 396 | k | 10 | 2009 | 22 | 25,06 | 24,22 | 0 | 0 | In |
| 397 | k | 5  | 2011 | 19 | 8,90  | 24,20 | 0 | 0 | In |
| 397 | k | 9  | 2011 | 19 | 30,30 | 24,20 | 0 | 0 | In |
| 397 | k | 12 | 2011 | 19 | 33,90 | 24,20 | 0 | 0 | In |
| 397 | k | 5  | 2012 | 20 | 49,70 | 24,20 | 0 | 0 | In |
| 397 | k | 12 | 2012 | 20 | 37,50 | 24,20 | 0 | 0 | In |
| 398 | m | 5  | 2014 | 37 | 20,80 | 22,00 | 0 | 0 | In |
| 399 | m | 4  | 2013 | 25 | 15,00 | 24,75 | 0 | 0 | In |
| 400 | m | 1  | 2012 | 28 | 31,70 | 25,25 | 0 | 0 | In |
| 401 | k | 5  | 2010 | 23 | 30,60 | 23,99 | 0 | 0 | In |
| 402 | k | 4  | 2014 | 27 | 28,70 | 23,99 | 0 | 0 | In |
| 403 | m | 4  | 2012 | 22 | 28,10 | 21,50 | 0 | 0 | In |
| 403 | m | 4  | 2013 | 23 | 18,00 | 21,50 | 0 | 0 | In |
| 403 | m | 5  | 2014 | 24 | 19,10 | 21,50 | 0 | 0 | In |
| 404 | k | 4  | 2012 | 30 | 10,00 | 21,72 | 0 | 0 | In |
| 405 | m | 7  | 2014 | 34 | 38,60 | 26,87 | 1 | 0 | In |
| 405 | m | 2  | 2015 | 35 | 25,50 | 26,87 | 0 | 0 | In |
| 406 | m | 9  | 2011 | 21 | 21,60 | 30,10 | 0 | 0 | In |
| 407 | m | 4  | 2012 | 35 | 27,10 | 24,50 | 0 | 0 | In |
| 408 | m | 4  | 2012 | 24 | 18,10 | 26,82 | 0 | 0 | In |
| 408 | m | 4  | 2013 | 25 | 13,00 | 26,82 | 0 | 0 | In |
| 409 | m | 10 | 2009 | 25 | 21,28 | 27,61 | 0 | 0 | In |
| 409 | m | 1  | 2010 | 26 | 14,49 | 27,61 | 0 | 0 | In |
| 409 | m | 6  | 2011 | 27 | 24,00 | 27,61 | 0 | 0 | In |
| 410 | m | 12 | 2011 | 14 | 13,00 | 28,40 | 0 | 0 | In |
| 411 | m | 4  | 2013 | 25 | 12,00 | 24,45 | 0 | 0 | In |
| 412 | m | 4  | 2012 | 33 | 33,80 | 22,28 | 0 | 0 | In |
